# Supplementary material for: Novel acridine-based thiosemicarbazones as ‘turn-on' chemosensors for selective recognition of fluoride anion: a spectroscopic and theoretical study
Source: R Soc Open Sci. 2018 Jul 4;5(7):180646. doi: 10.1098/rsos.180646 (PMC6083729; doi:10.1098/rsos.180646)
Supplement: Revised-Acridine-Thiosemicarbazones _NMR spectra and other [file rsos180646supp1.docx]

**Novel Acridine-Based Thiosemicarbazones as “Turn-on” Chemosensors for Selective Recognition of Fluoride anion: A Spectroscopic and Theoretical Study**

Ibanga Okon Isaac,a Iqra Munir,a Mariya al-Rashida,c Syed Abid Ali,a Zahid Shafiq,d Muhammad Islam,d Ralf Ludwig,e,f Khurshid Ayub,b* Khalid Mohammed Khan,a,g and Abdul Hameed**[[1]](#footnote-1)***a

aH. E. J. Research Institute of Chemistry, International Center for Chemical and Biological Sciences, University of Karachi, Karachi-75270, Pakistan

bDepartment of Chemistry, COMSATS Institute of Information Technology, Abbottabad, KPK, Pakistan 22060

cDepartment of Chemistry, Forman Christian College (A Chartered University), Ferozepur Road, Lahore, Pakistan

dInstitute of Chemical Sciences, Organic Chemistry Division, Bahauddin Zakariya University, Multan 60800, Pakistan

eLeibniz-Institut für Katalyse e. V. an der Universität Rostock, Albert-Einstein-Str. 29a, 18059 Rostock, Germany

fDepartment of Physical Chemistry, University of Rostock, Dr.-Lorenz-Weg 1, 18059 Rostock, Germany

gDepartment of Clinical Pharmacy, Institute for Research and Medical Consultations (IRMC), Imam Abdulrahman Bin Faisal University, P.O. Box 31441, Dammam, Saudi Arabia


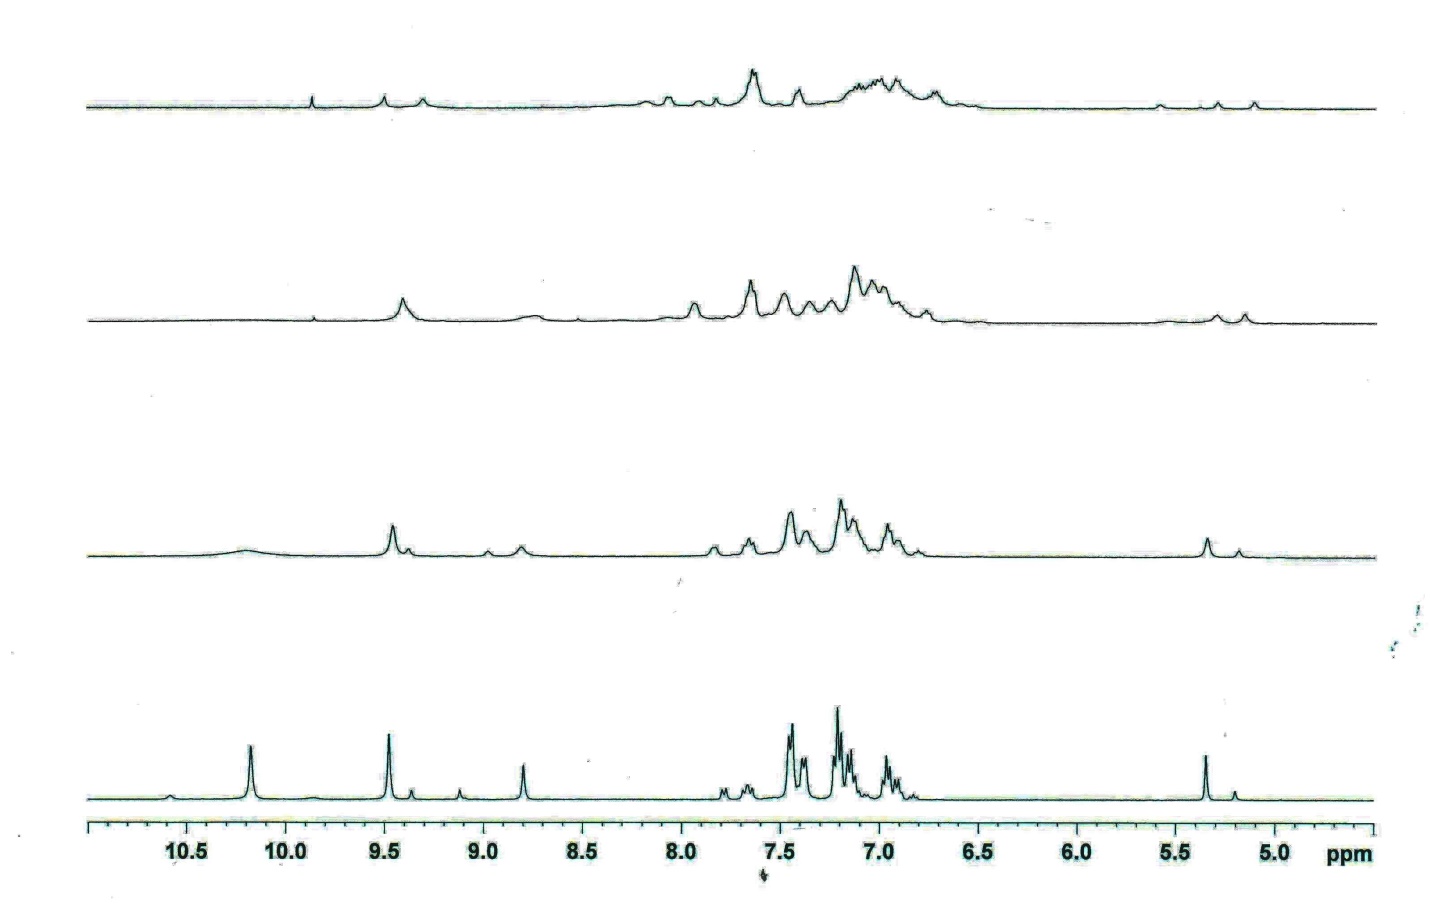


**3a** + 1 equiv. Fˉ

**3a** + 2 equiv. Fˉ

**3a** + 4 equiv. Fˉ

**3a** + 0 equiv. Fˉ

**Figure-S1**: Fluoride (Fˉ) anion gradual addition to probe **3a**: 1H NMR spectra; a) without Fˉ anion and b) 1 equiv. c) 2 equiv. d) 4 equiv. of Fˉsource (TBAF) in DMSO- *d6* as solvent.

**Table-S1**: UV-Vis absorption/fluorescence bands for probes **1-3** in DMSO/acetonitrile as solvent.

| **Probes** | **Absorptions Bands**  **(nm)** | | **Fluorescence**  **(Ex: 278 nm)** |
| --- | --- | --- | --- |
| **3a** | 320 | 415, 485 | 570, 670 |
| **3b** | 320 | 410 | 480, 570 |
| **3b** | 320 | 410 | - |

**Job Plot of 3a**





**LOD calculations of 3a**

**
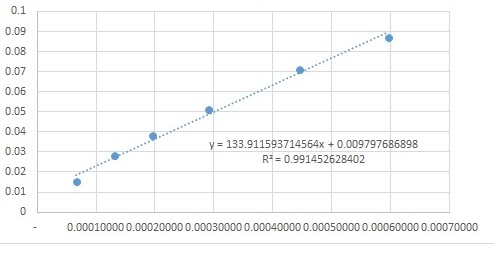
**

**Figure-S2:** Job’s plot and LOD of receptors **3a**.

**Job Plot of 3b**





**LOD calculations of 3b**

**
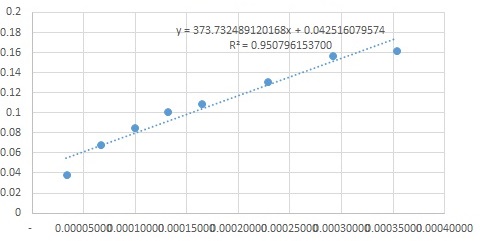
**

**Figure-S3:** Job’s plot and LOD of receptors **3b**.


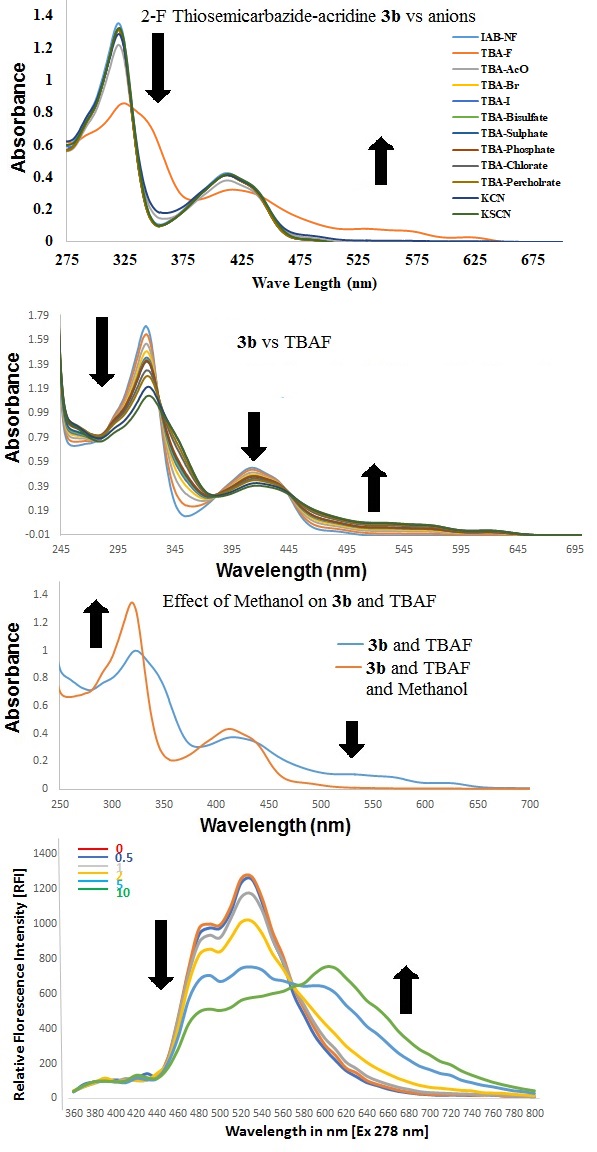


d)

b)

a)

c)

e)

Prob **3b**

Prob **3b** and

Toothpaste sample

Prob **3b** with toothpaste sample

**
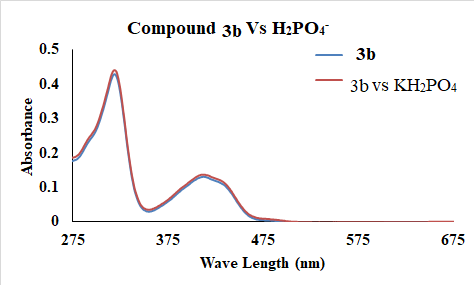
**

f)

**Figure-S4:** a) UV-Absorption spectra of probes **3b;** b) Absorption spectra of probe **3b** upon gradual increase of fluoride addition; c) Upon dilution in methanol absorbance restored **3b**;d)Fluorescence spectra of receptor **3b** (excitation at 270 nm) upon the gradual increase of fluoride anion by using DMSO/acetonitrile as solvent; e) UV-Absorption spectra of probes **3b** with toothpaste sample; f) Prob **3b** vs potassium dihydrogen phosphate (30 eq) in acetonitrile: water (9:1).

a)

b)

c)

**

**

d)

e)

**Figure-S5:** a) Fluoride detection by Probes **3c** a) UV-Absorption spectra of probes **3c** b) Absorption spectra of probe **3c** upon gradual increase of fluoride addition c) Upon dilution in methanol absorbance restored **3c**; d) Job’s plot and e) LOD of receptors **3b**.


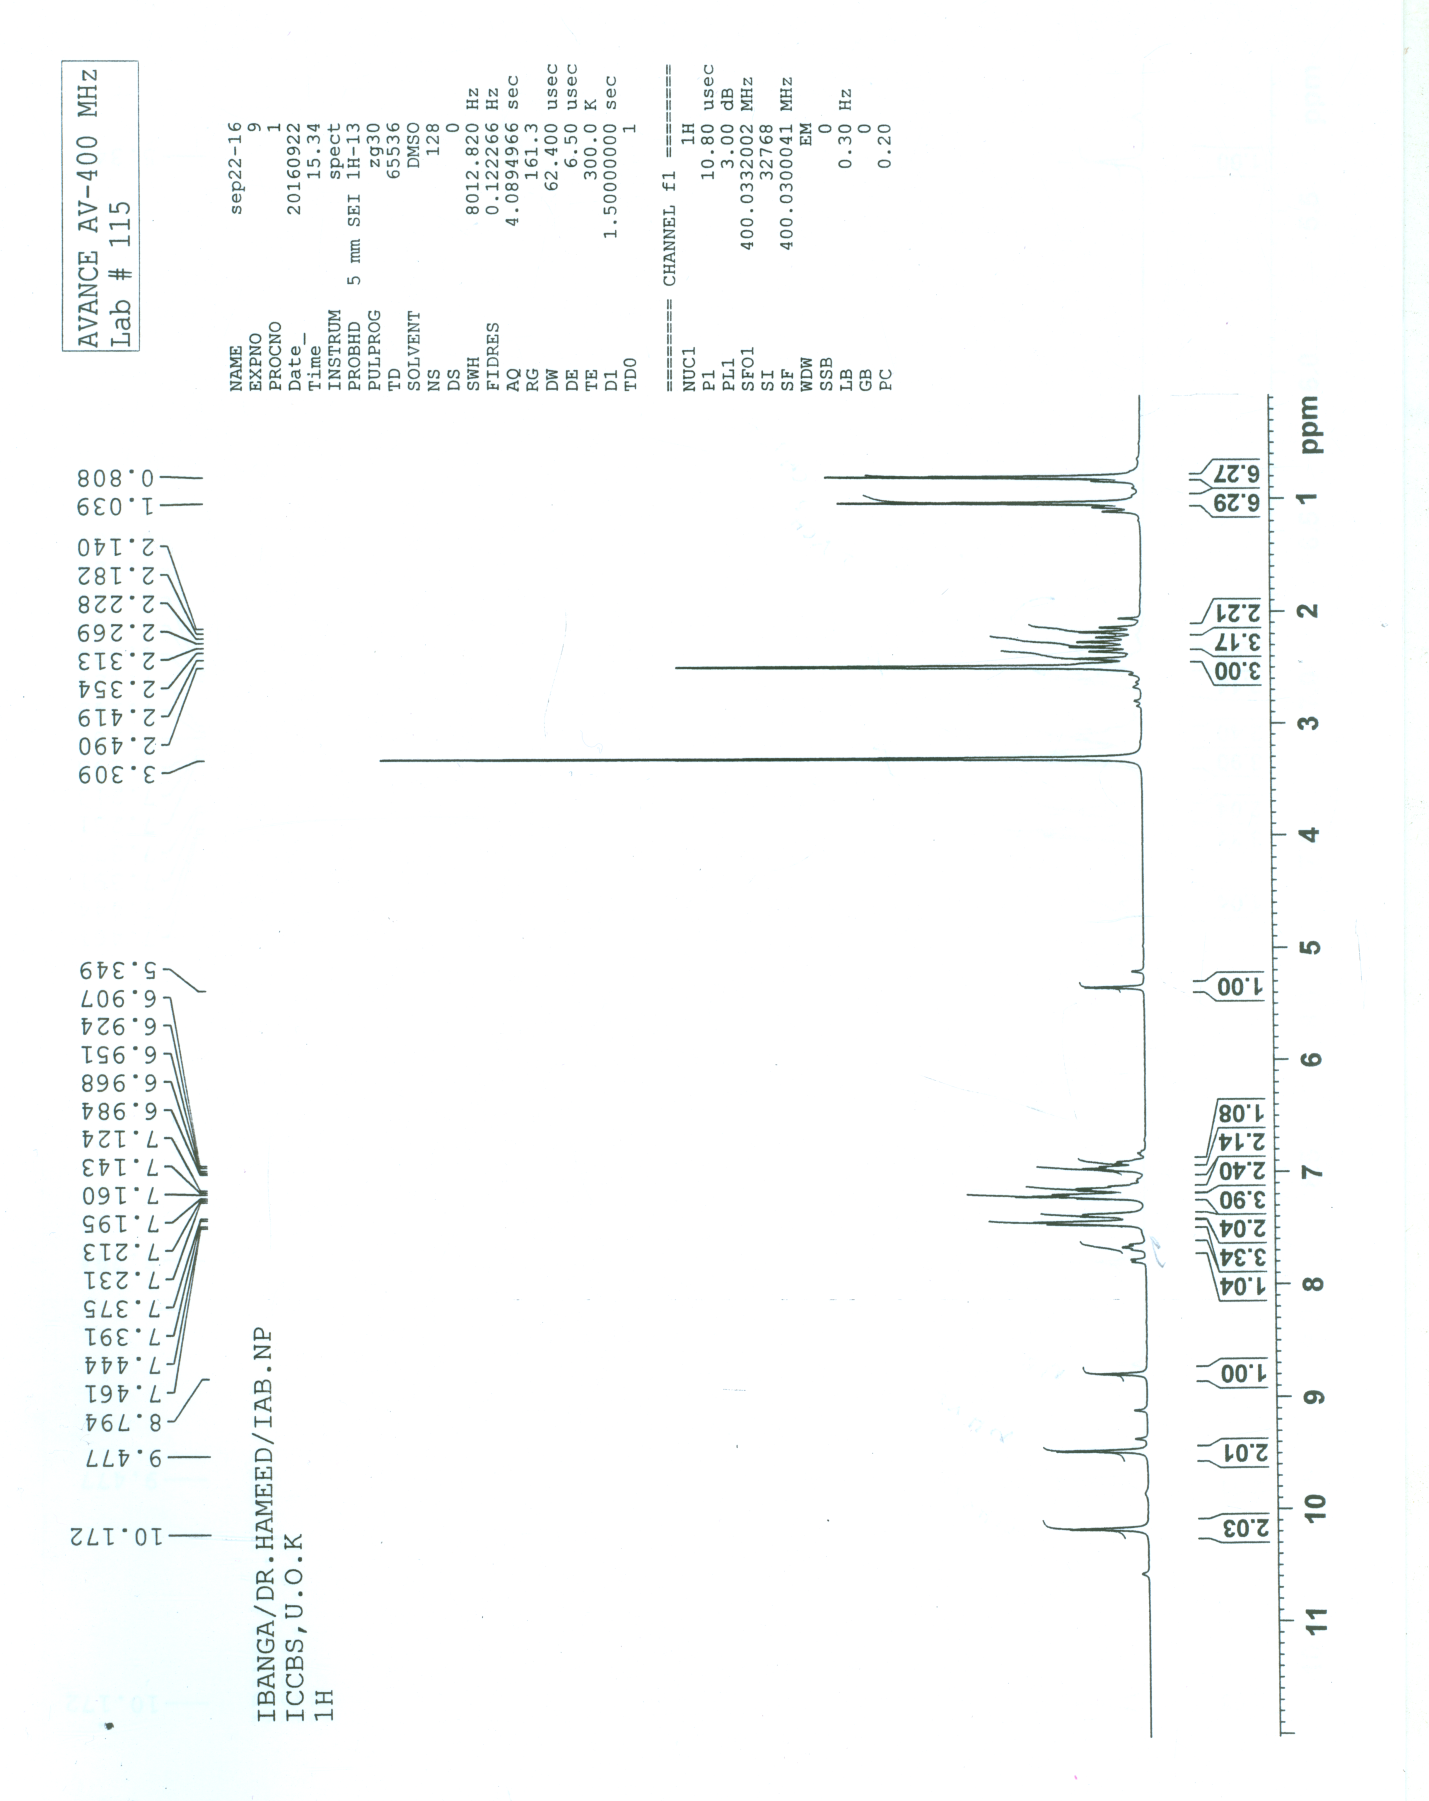

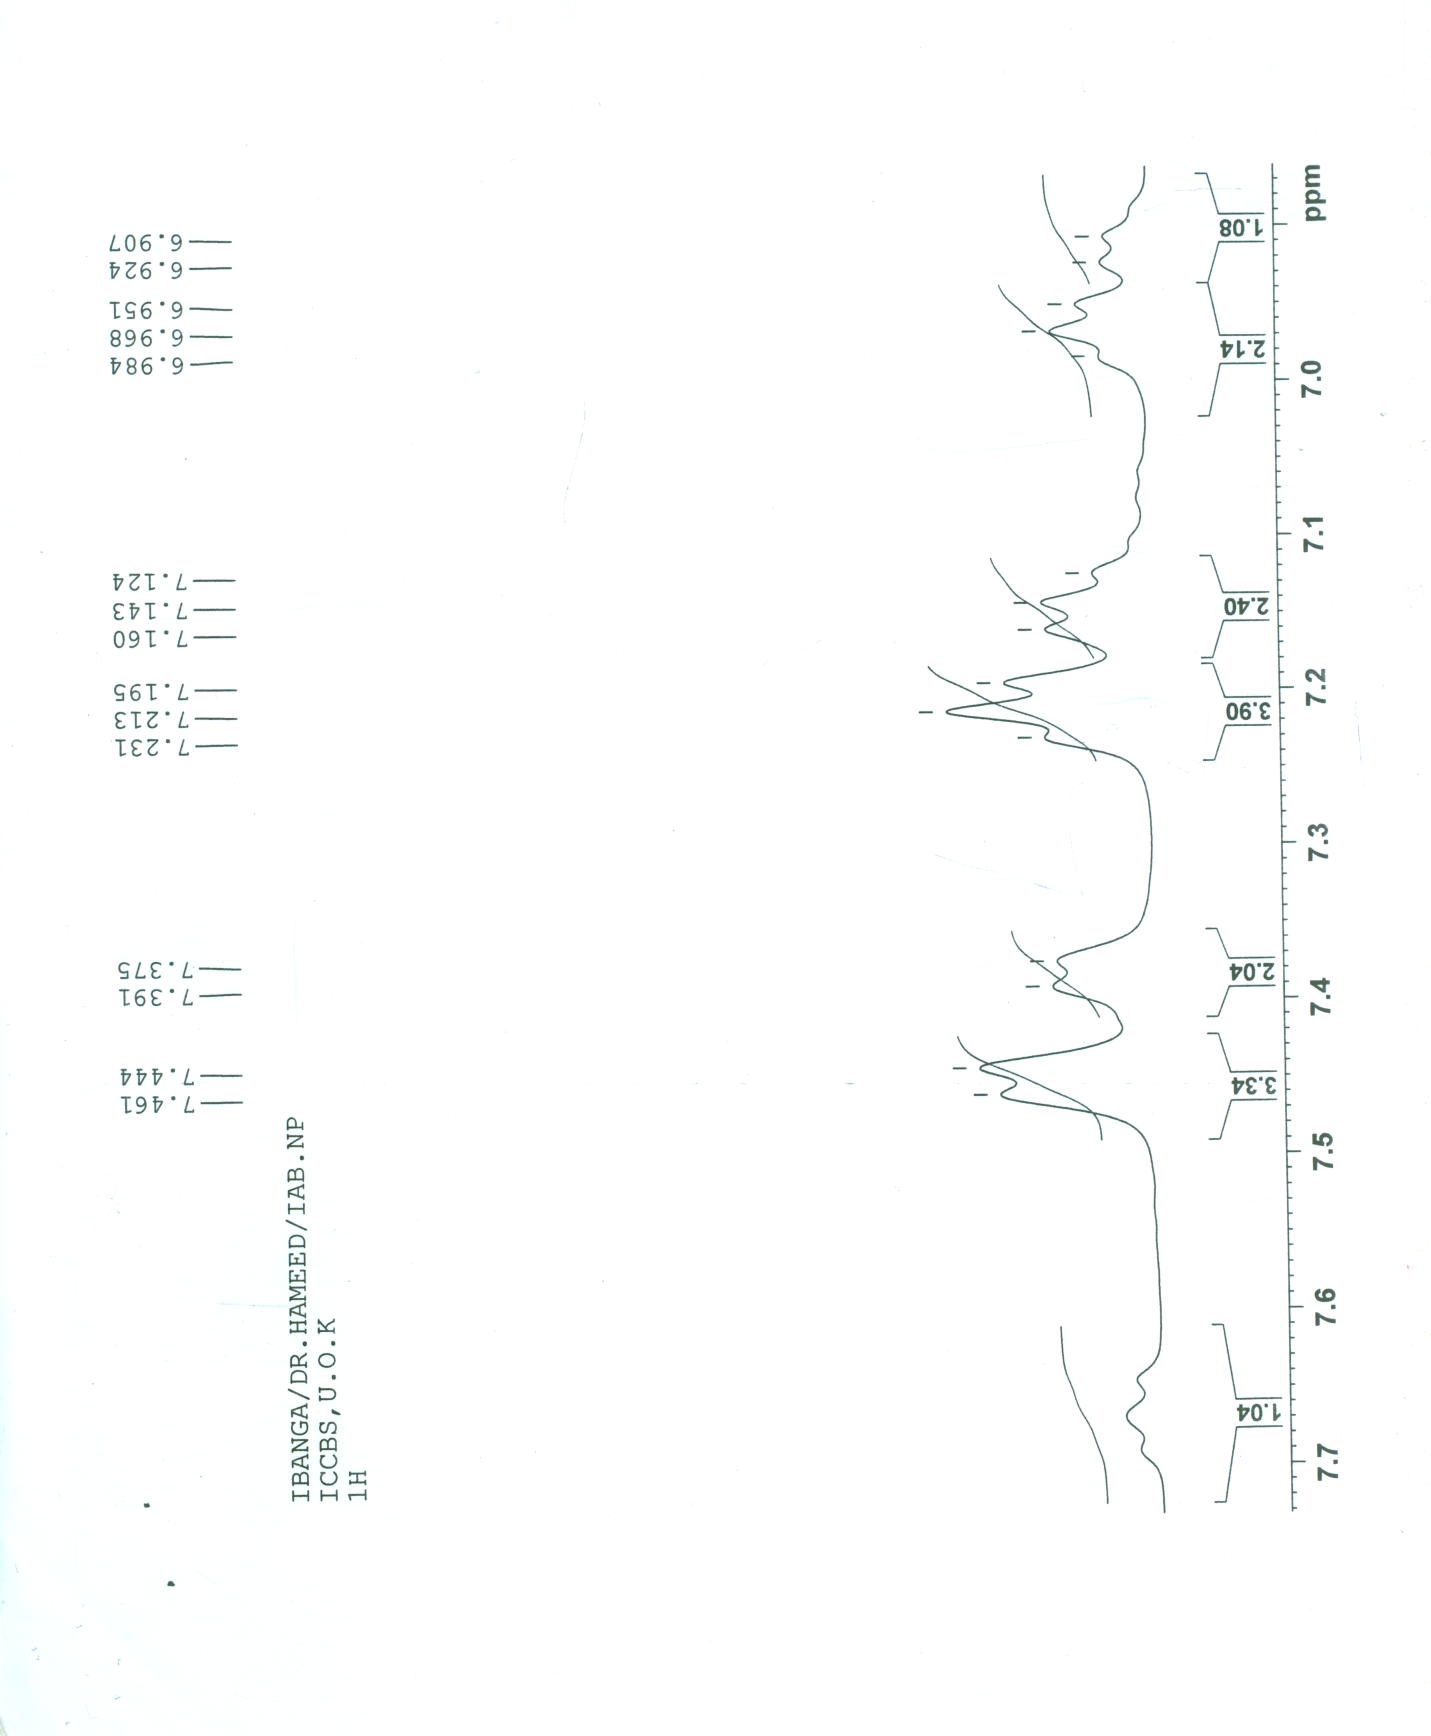

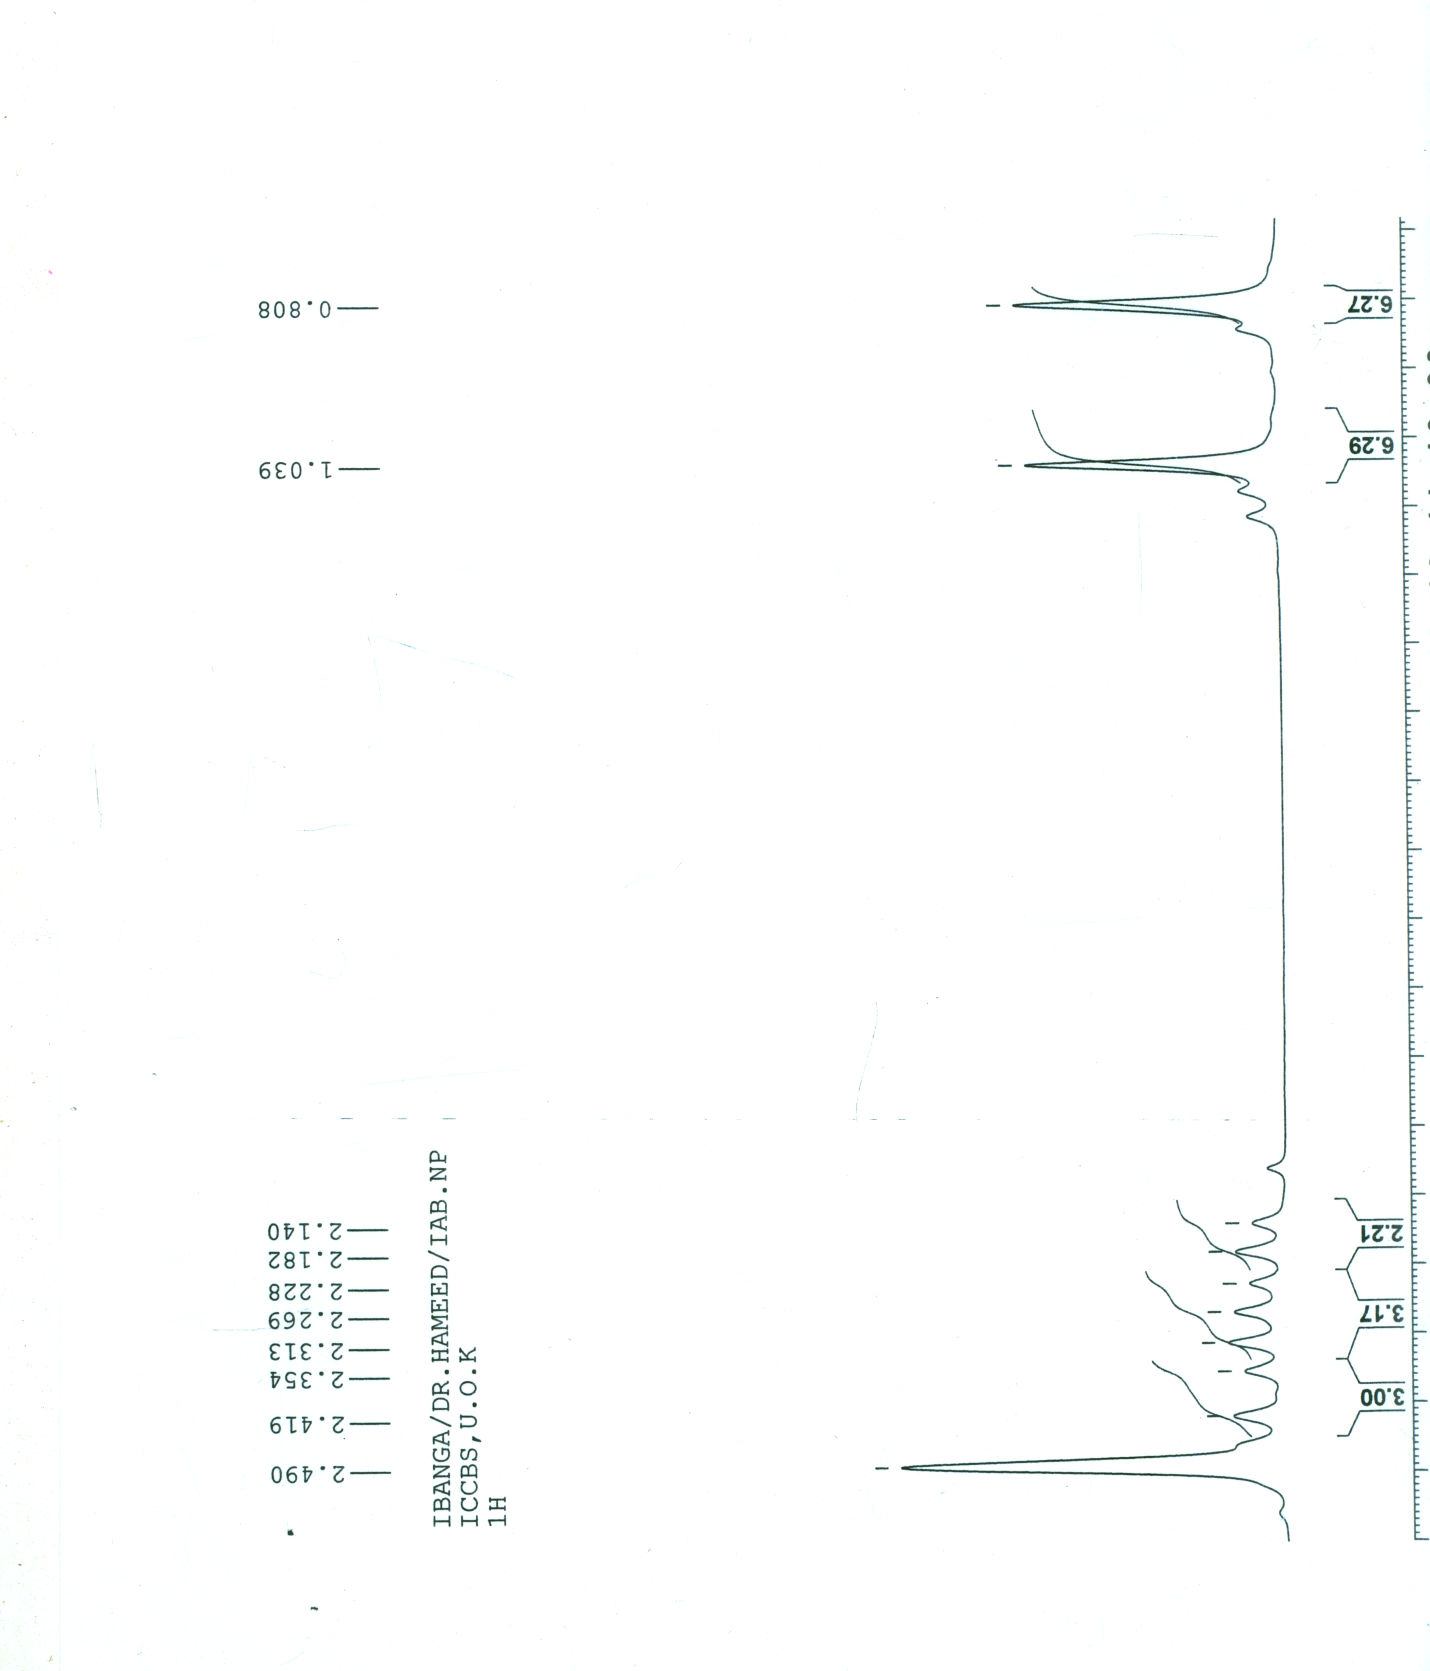


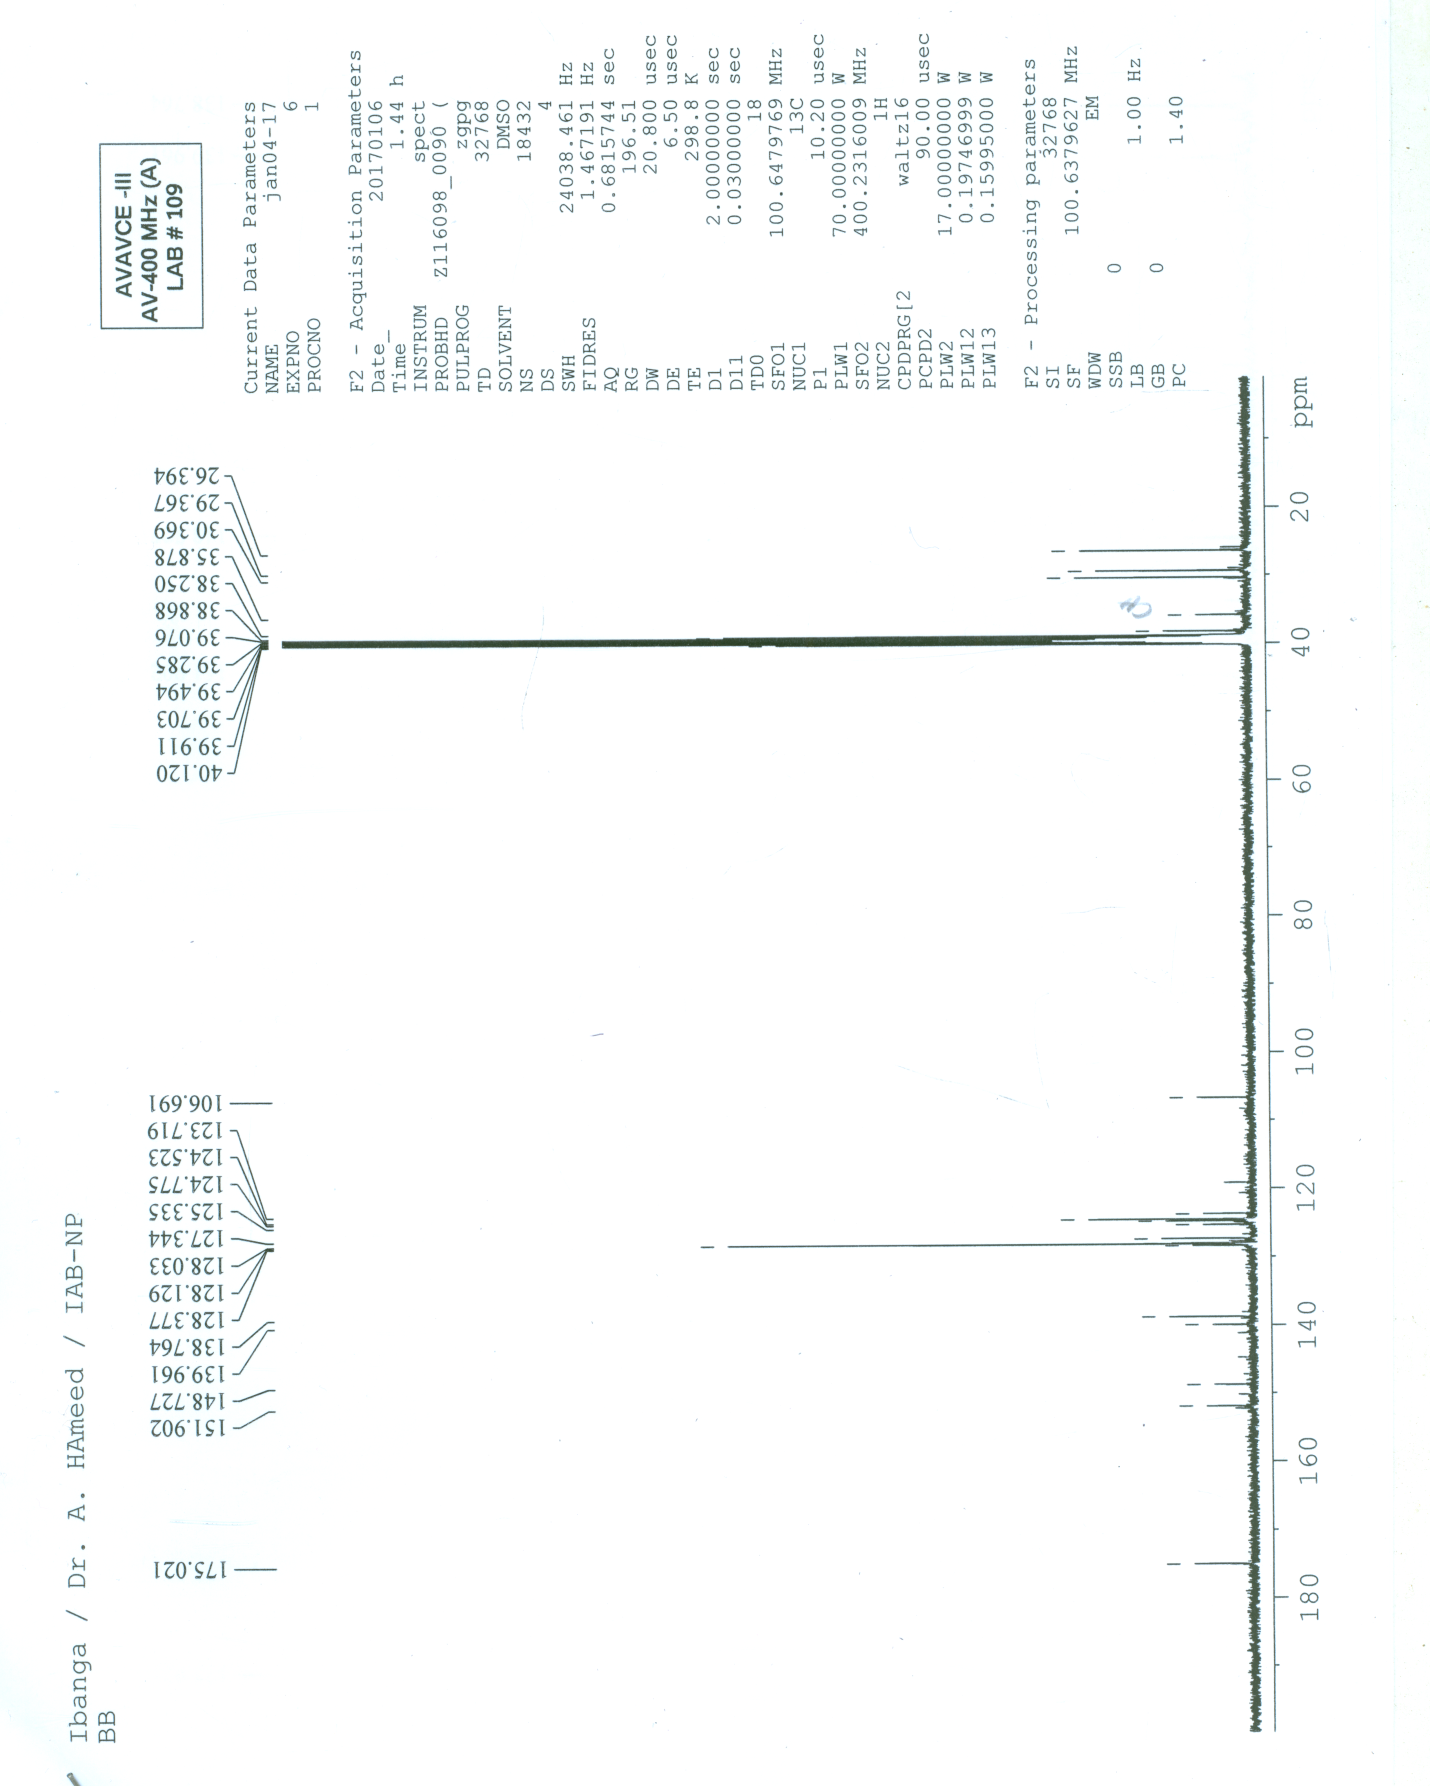

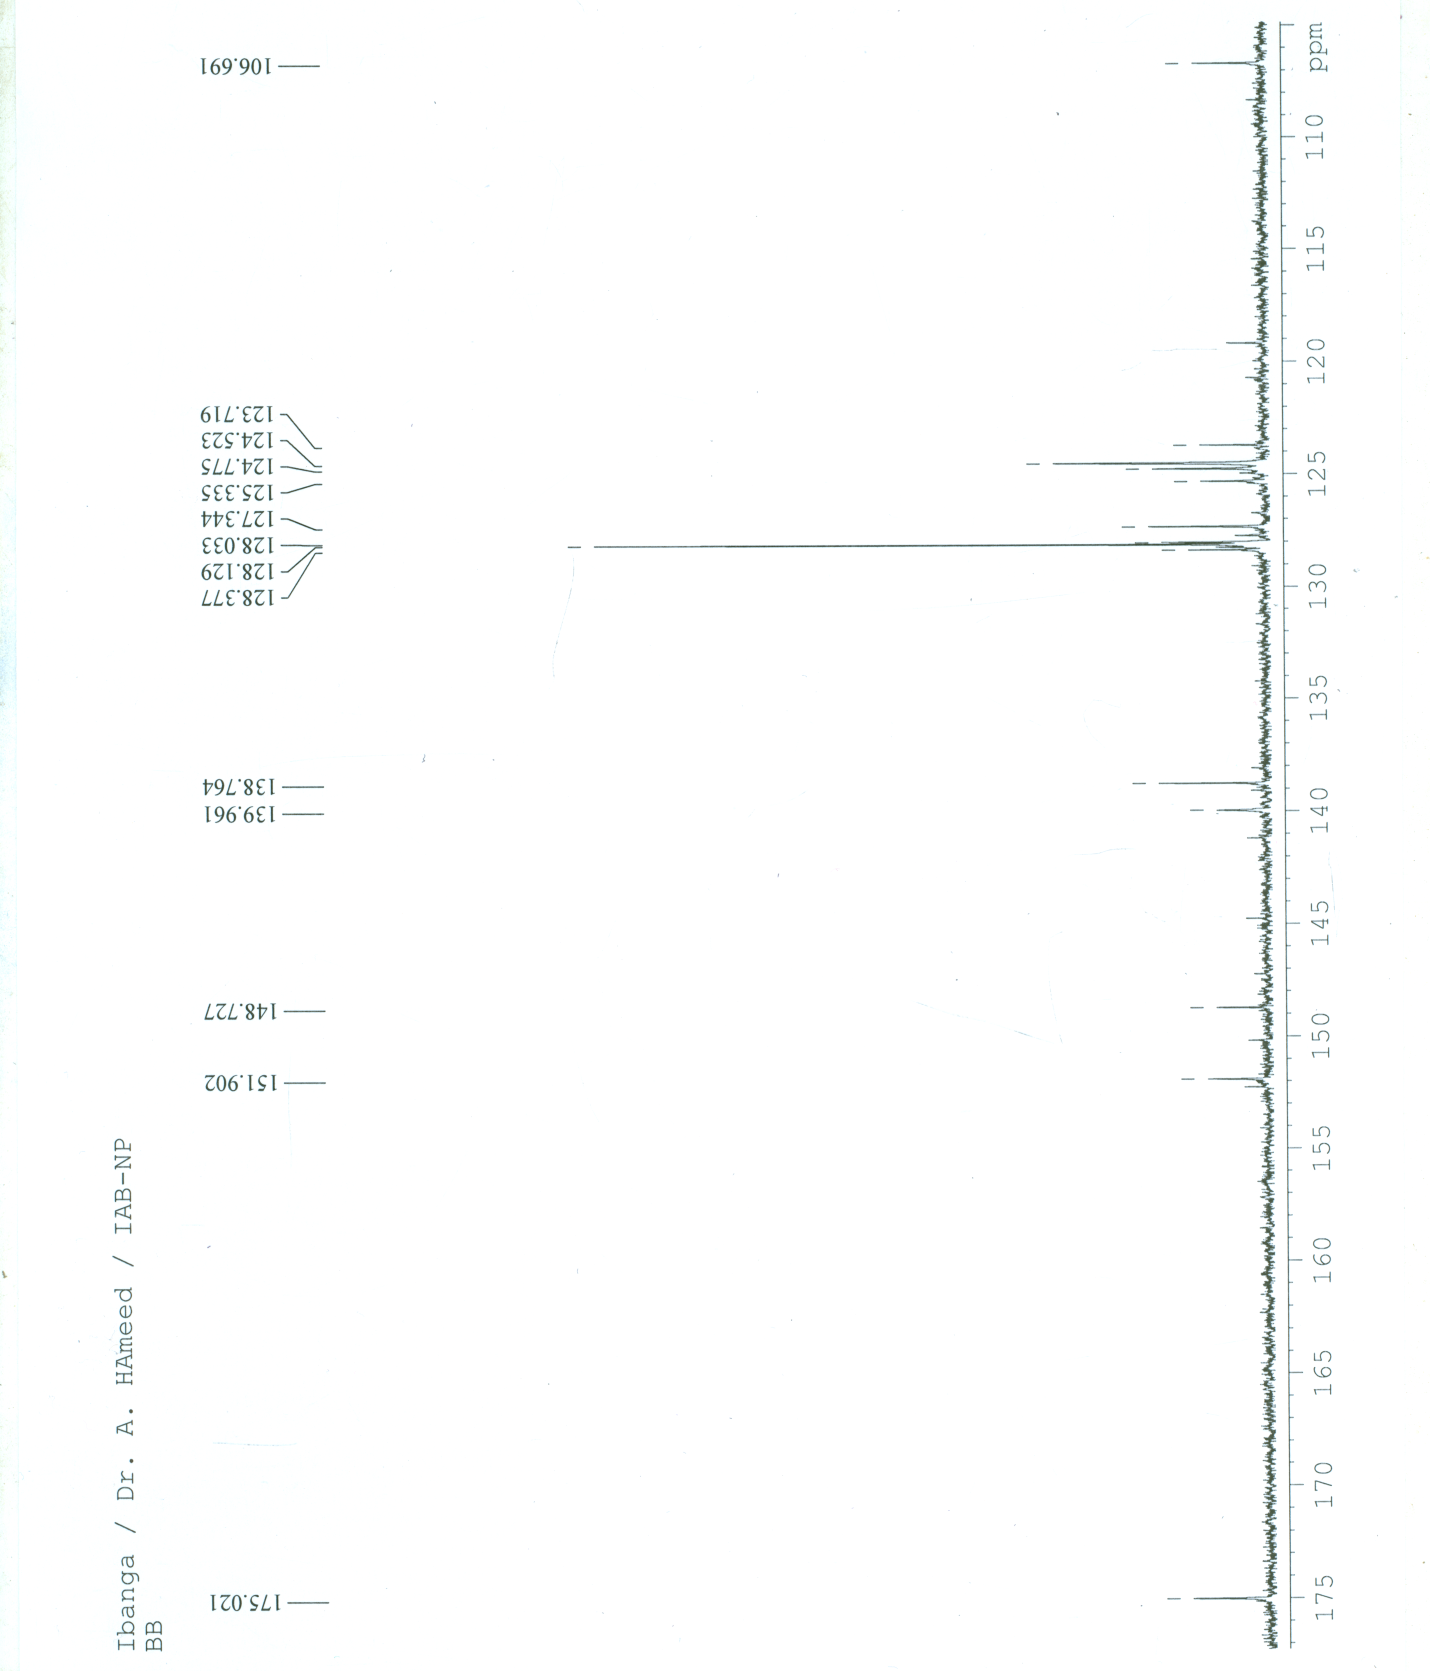

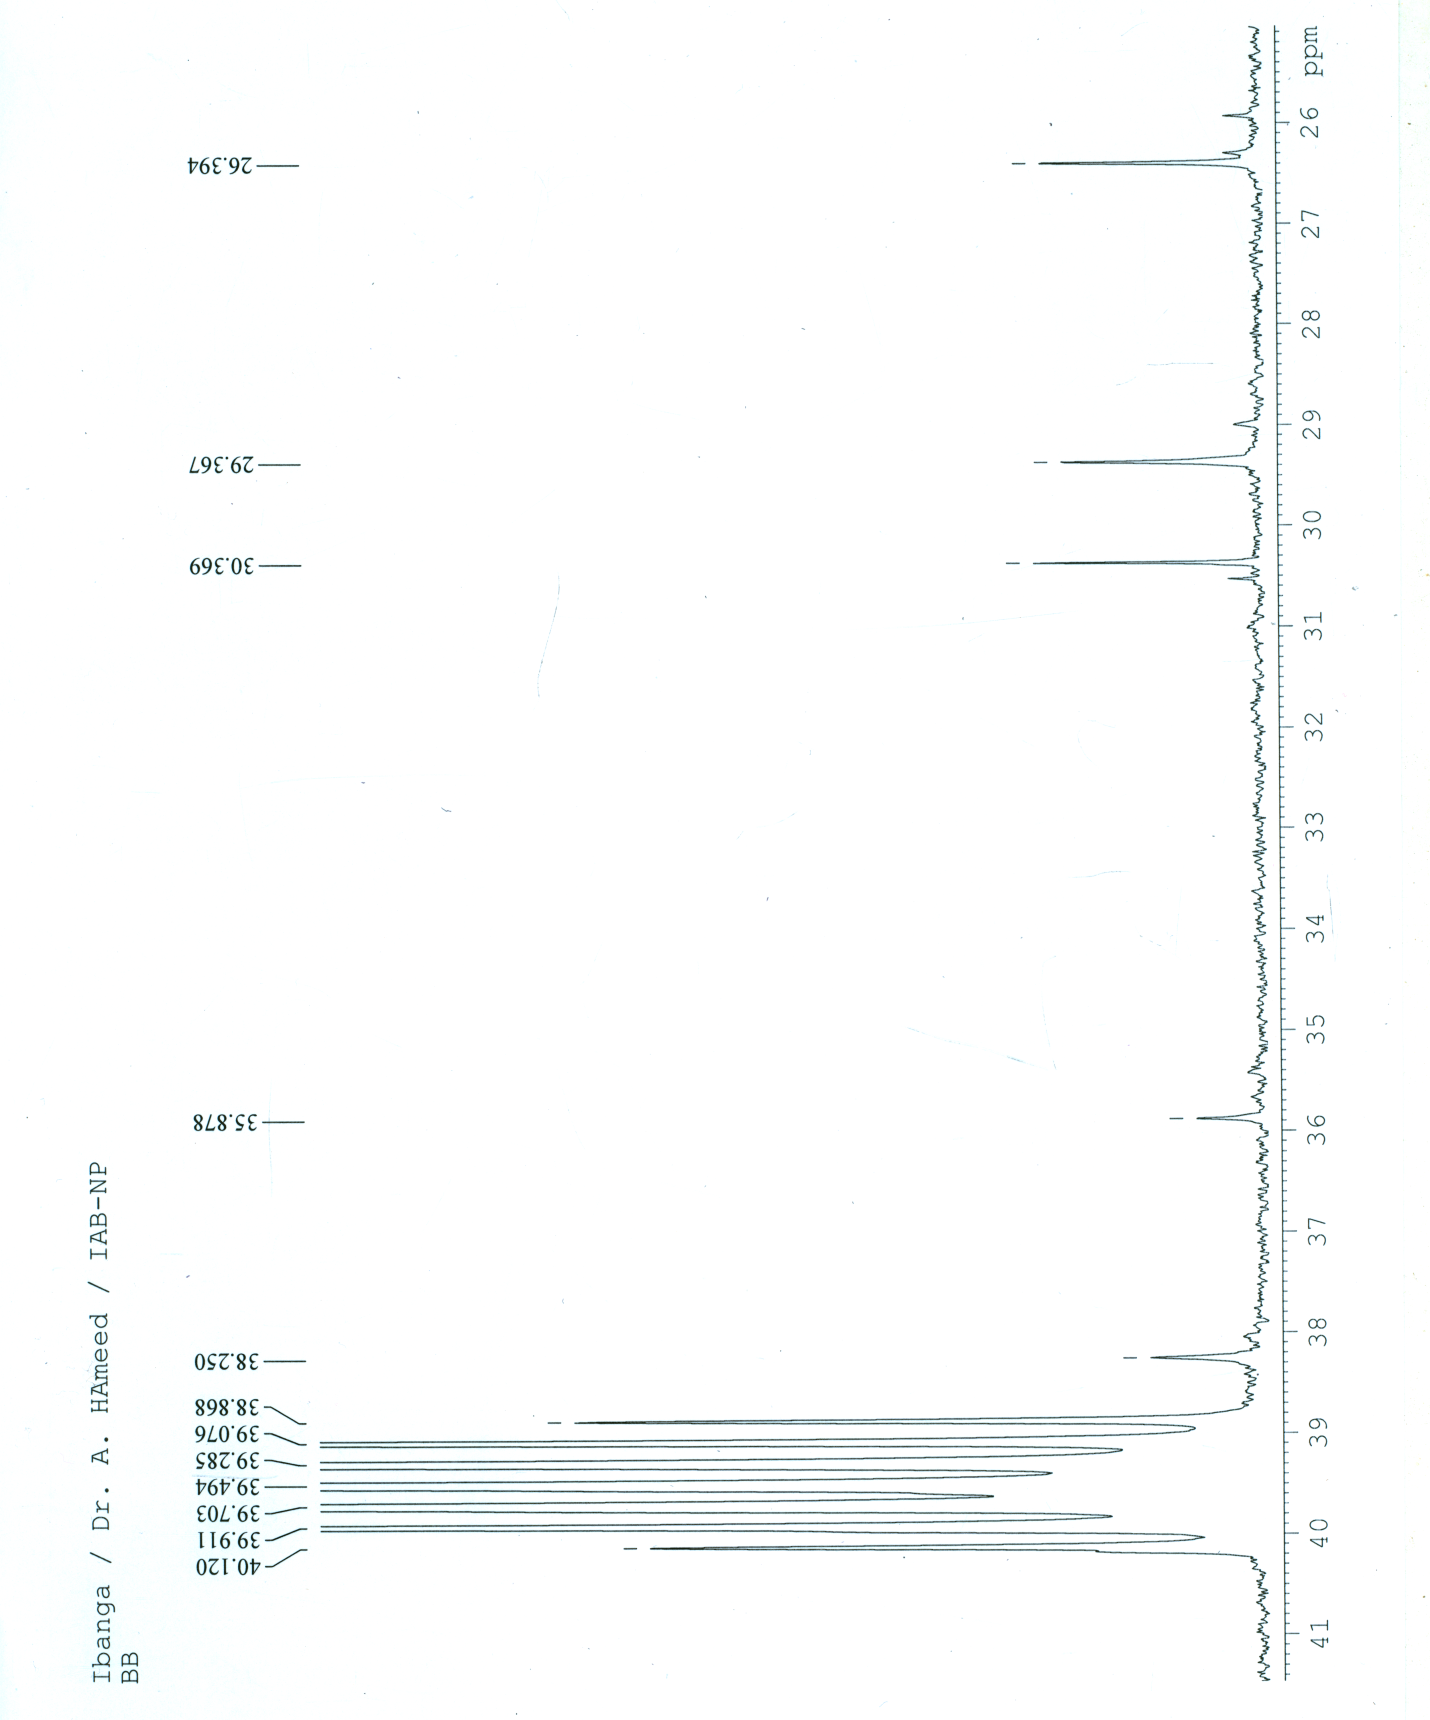


**
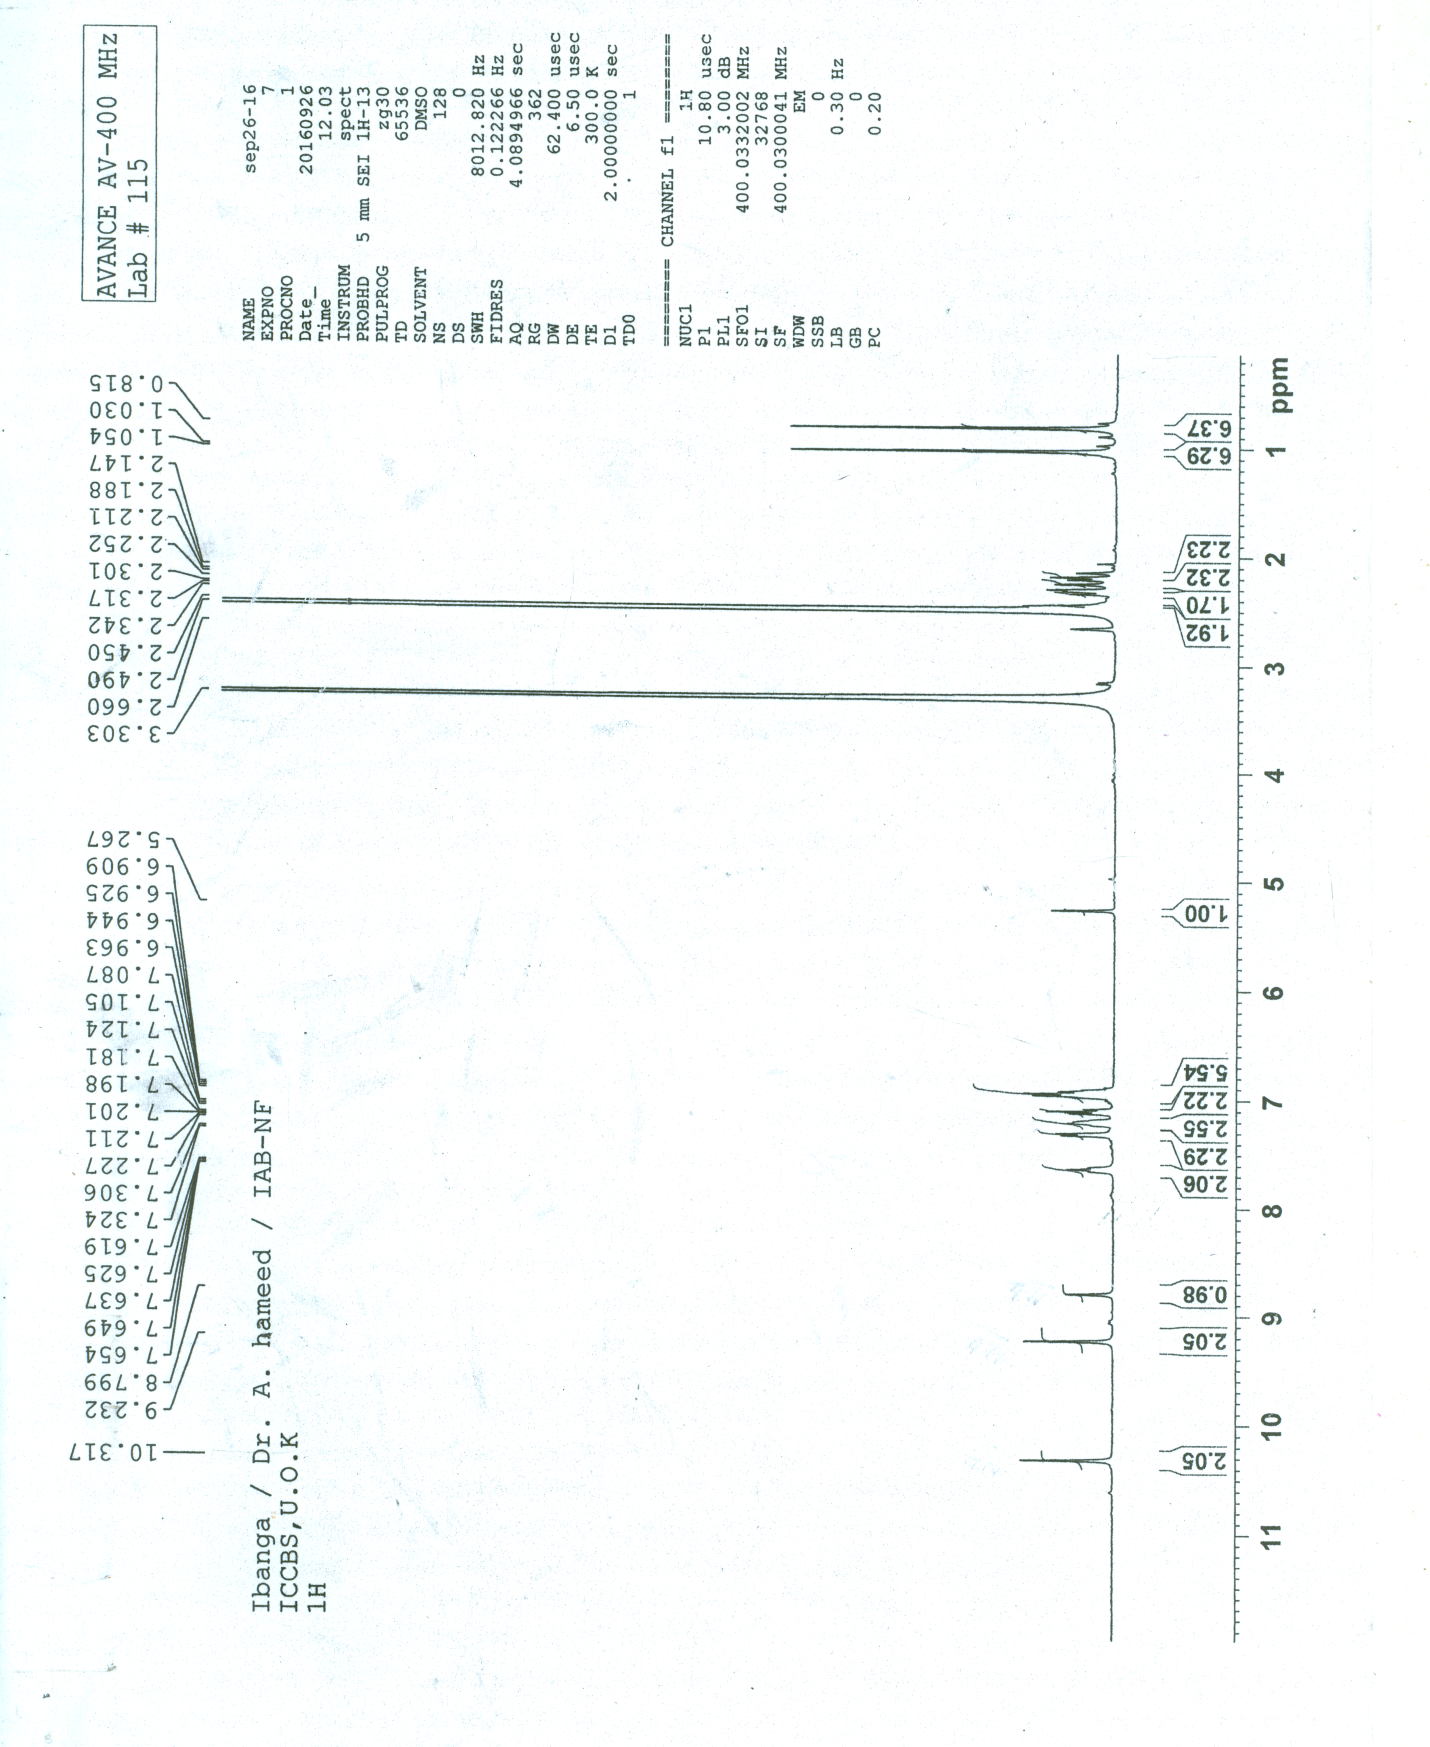

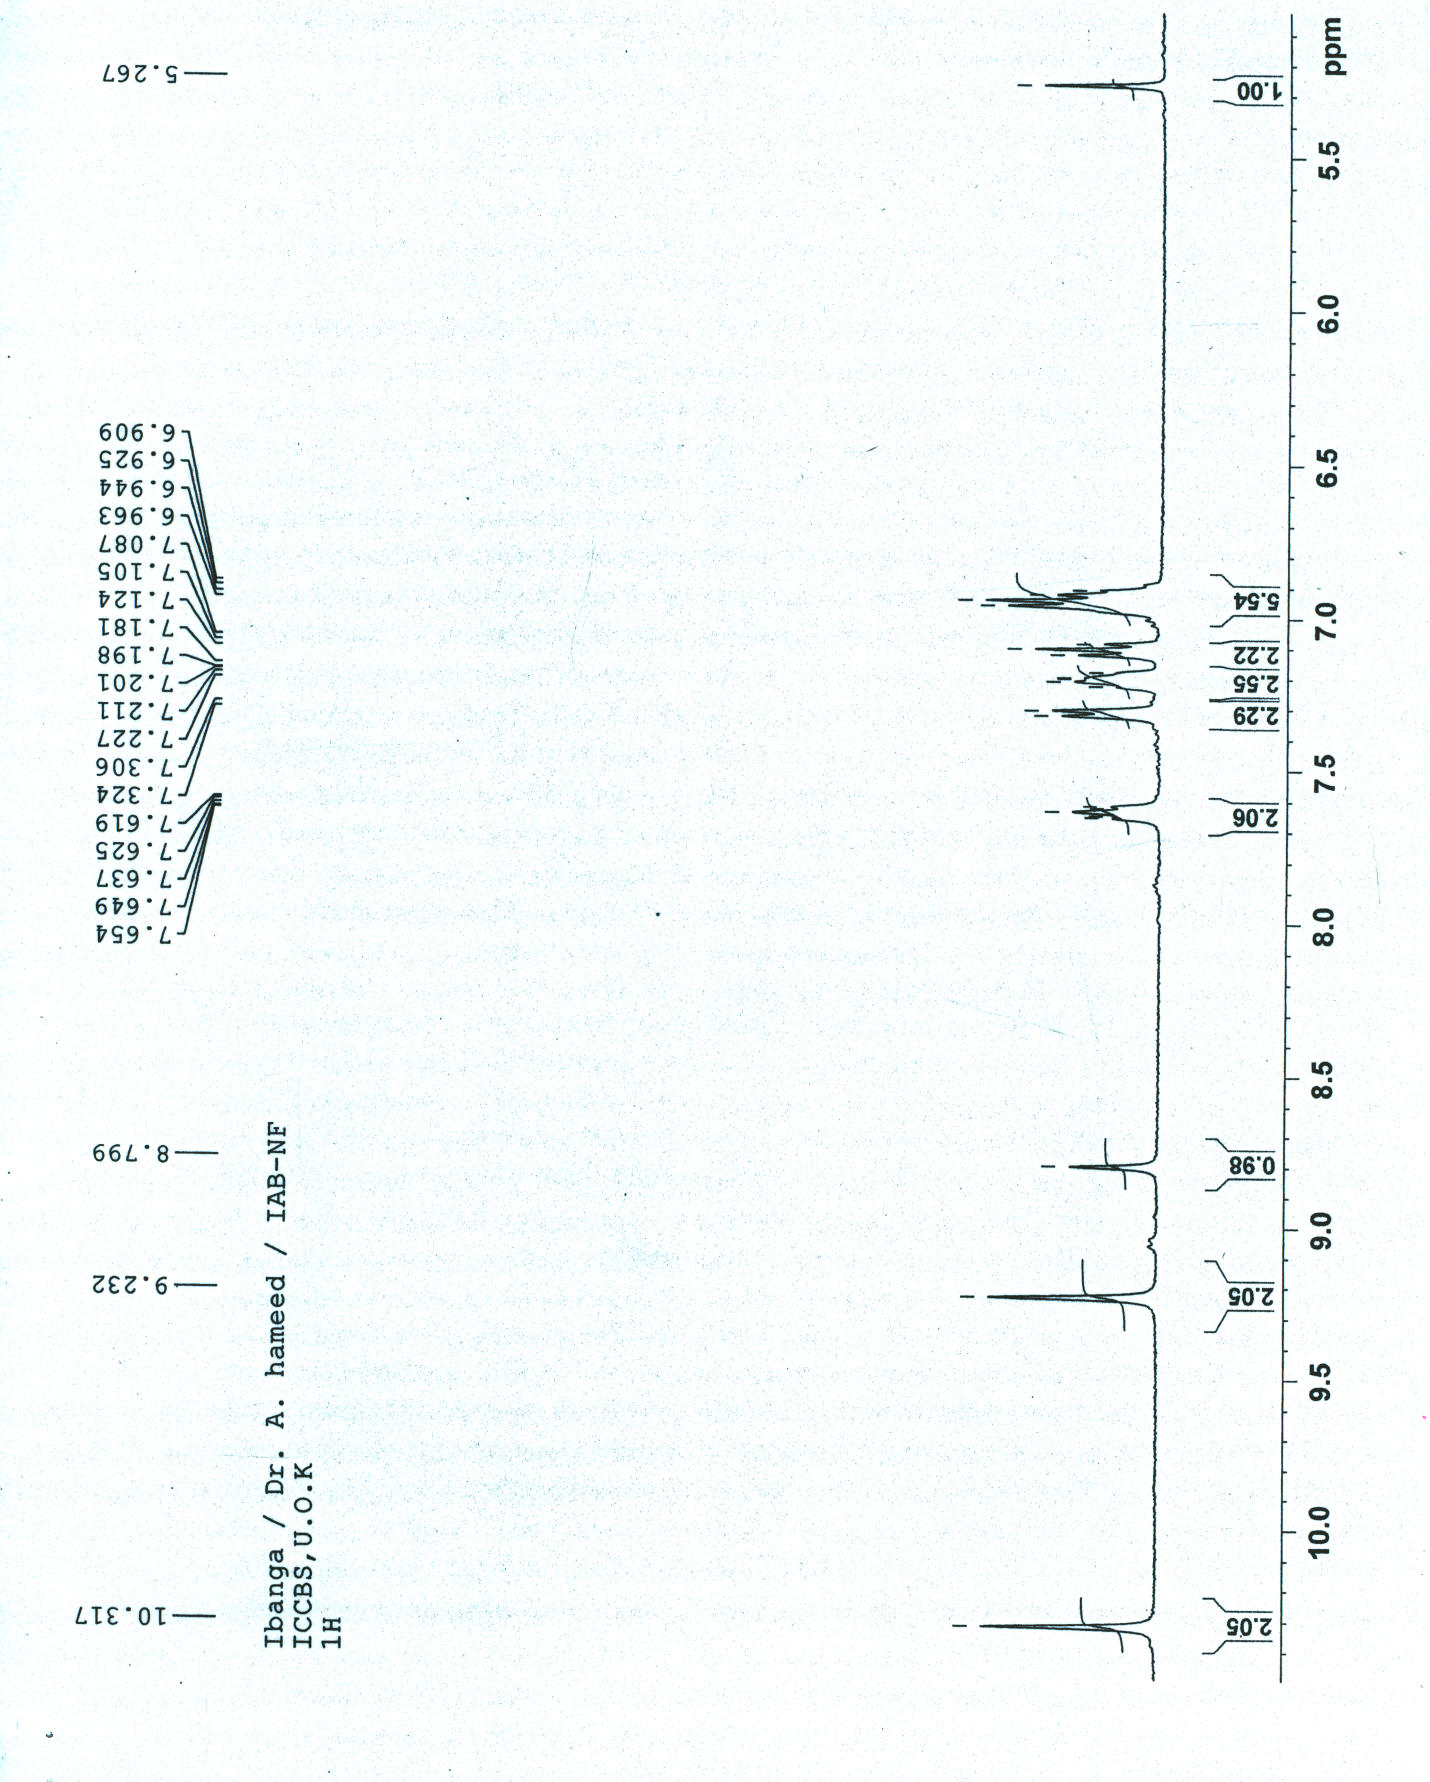
**

**
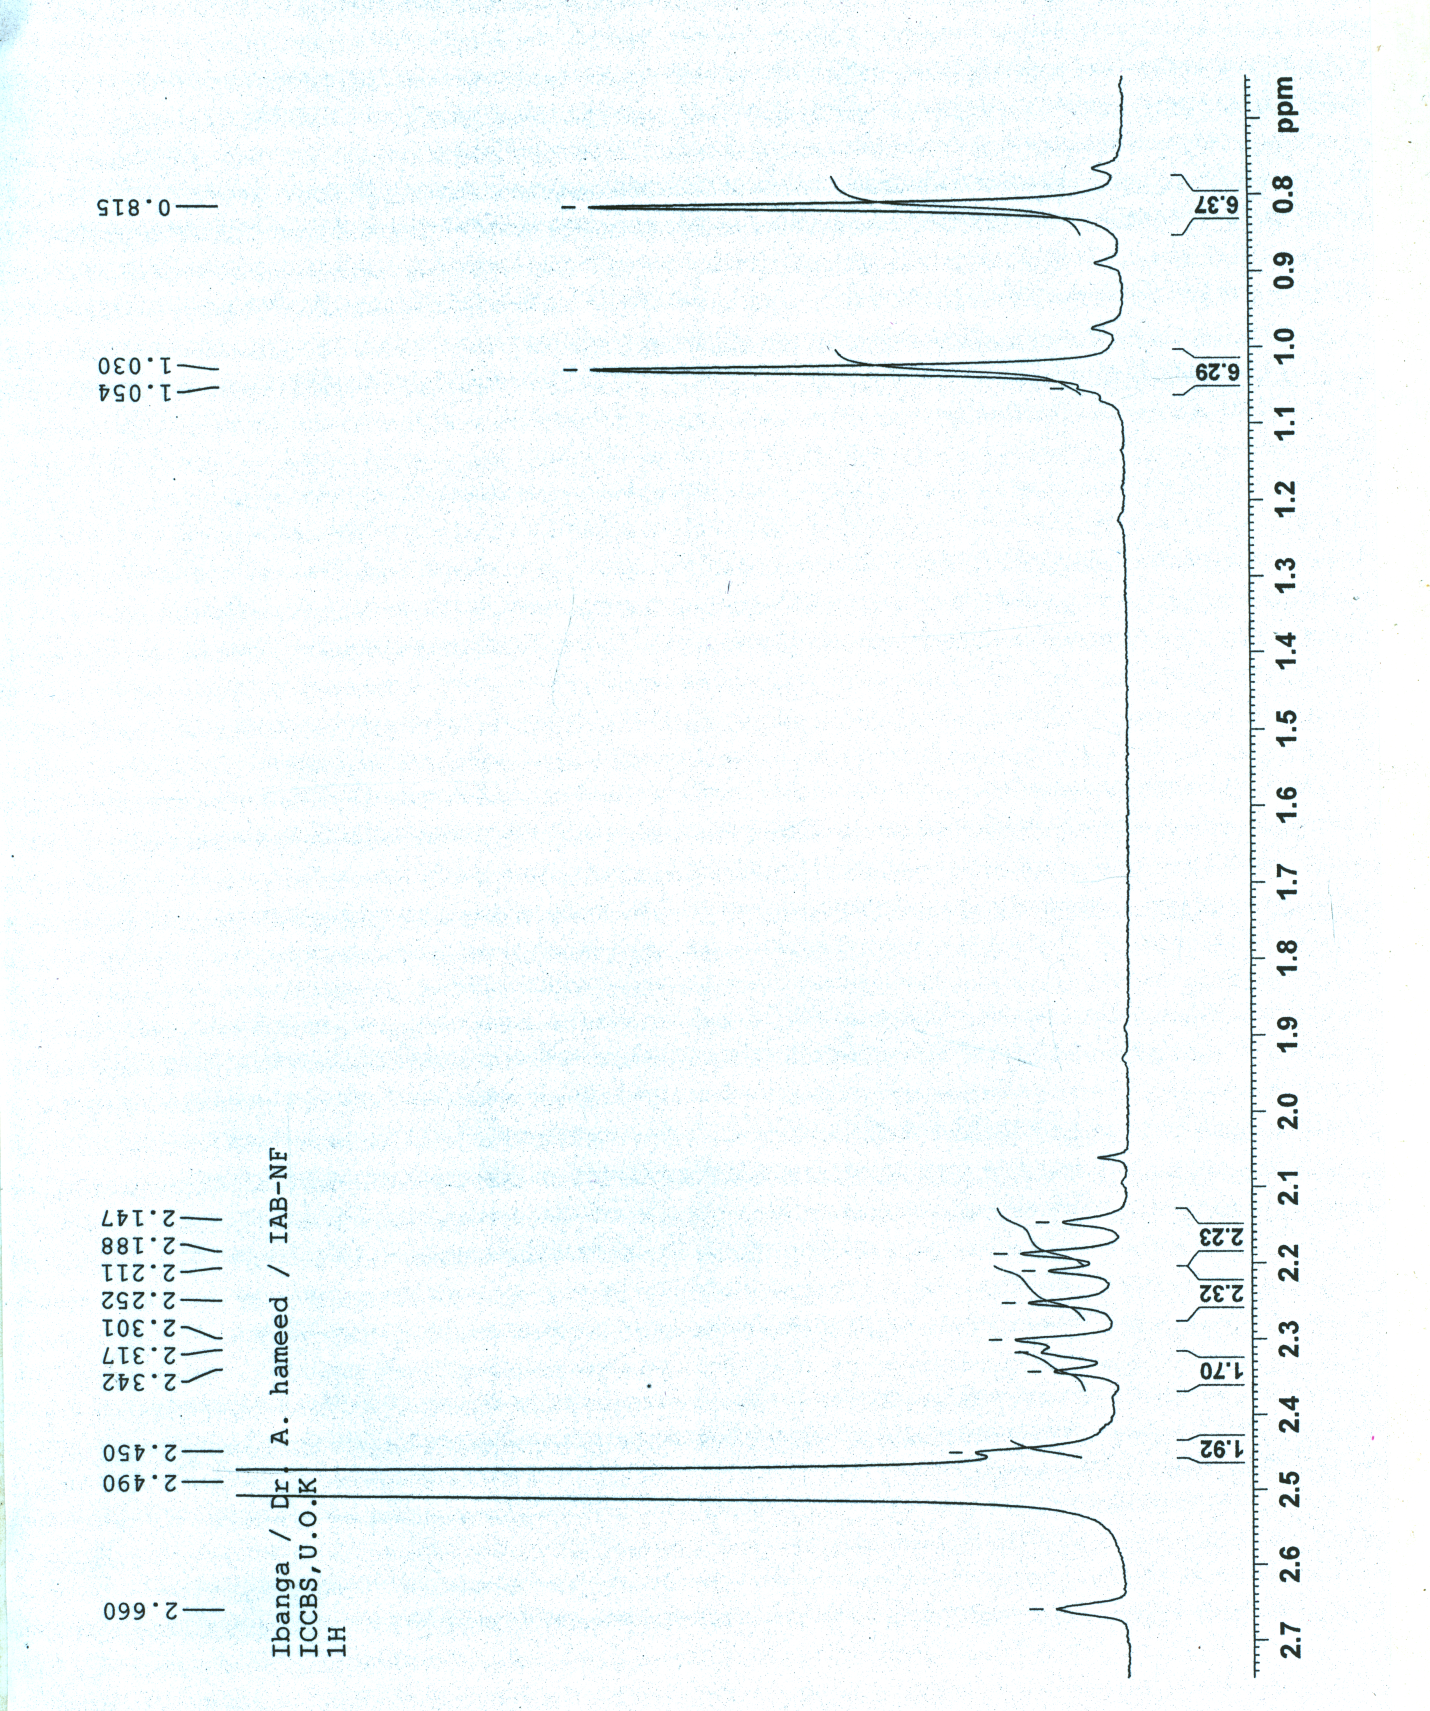

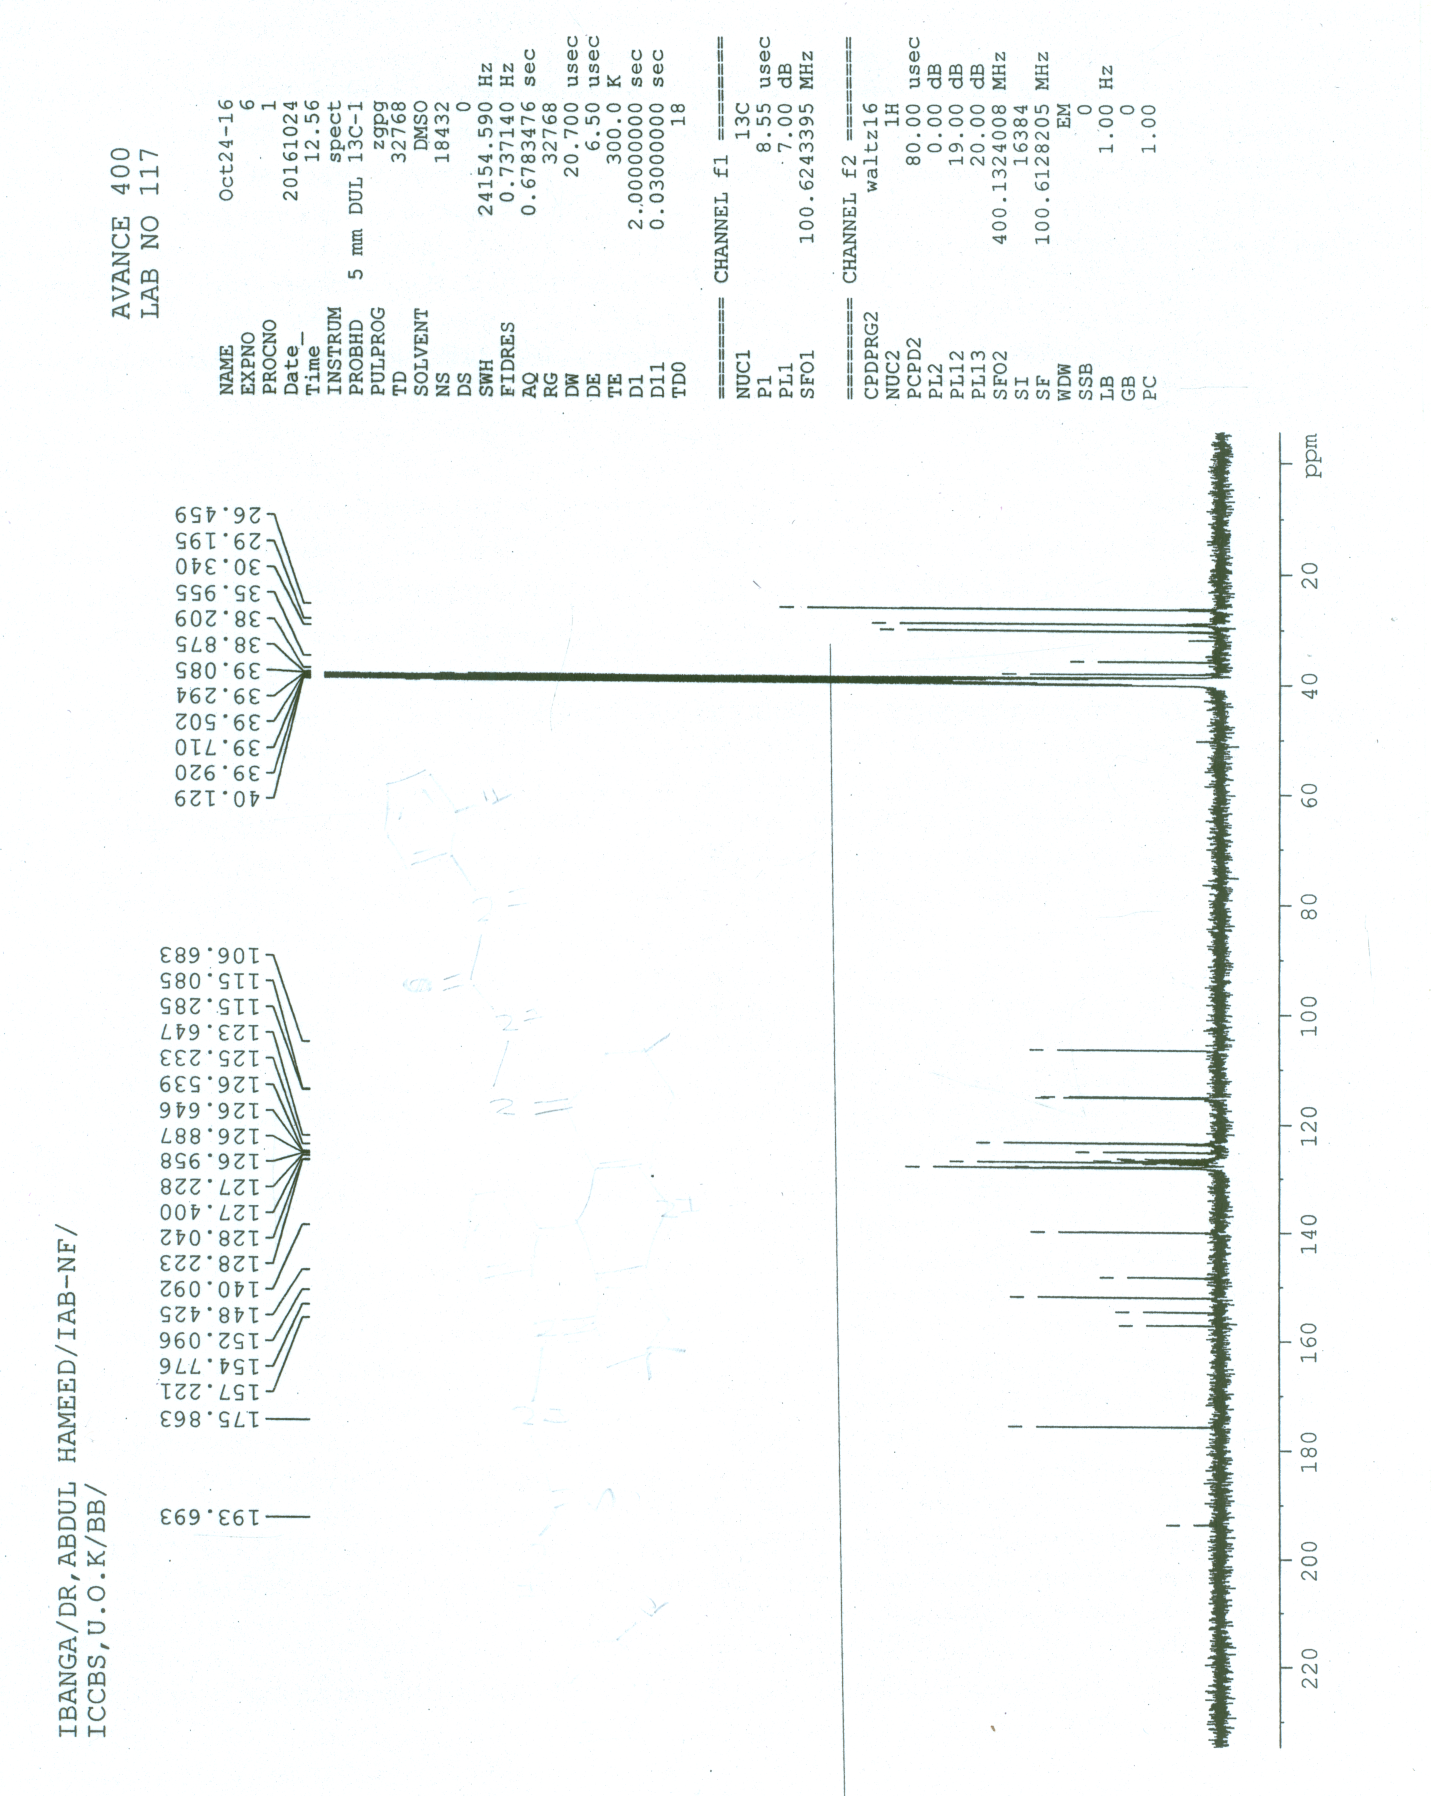

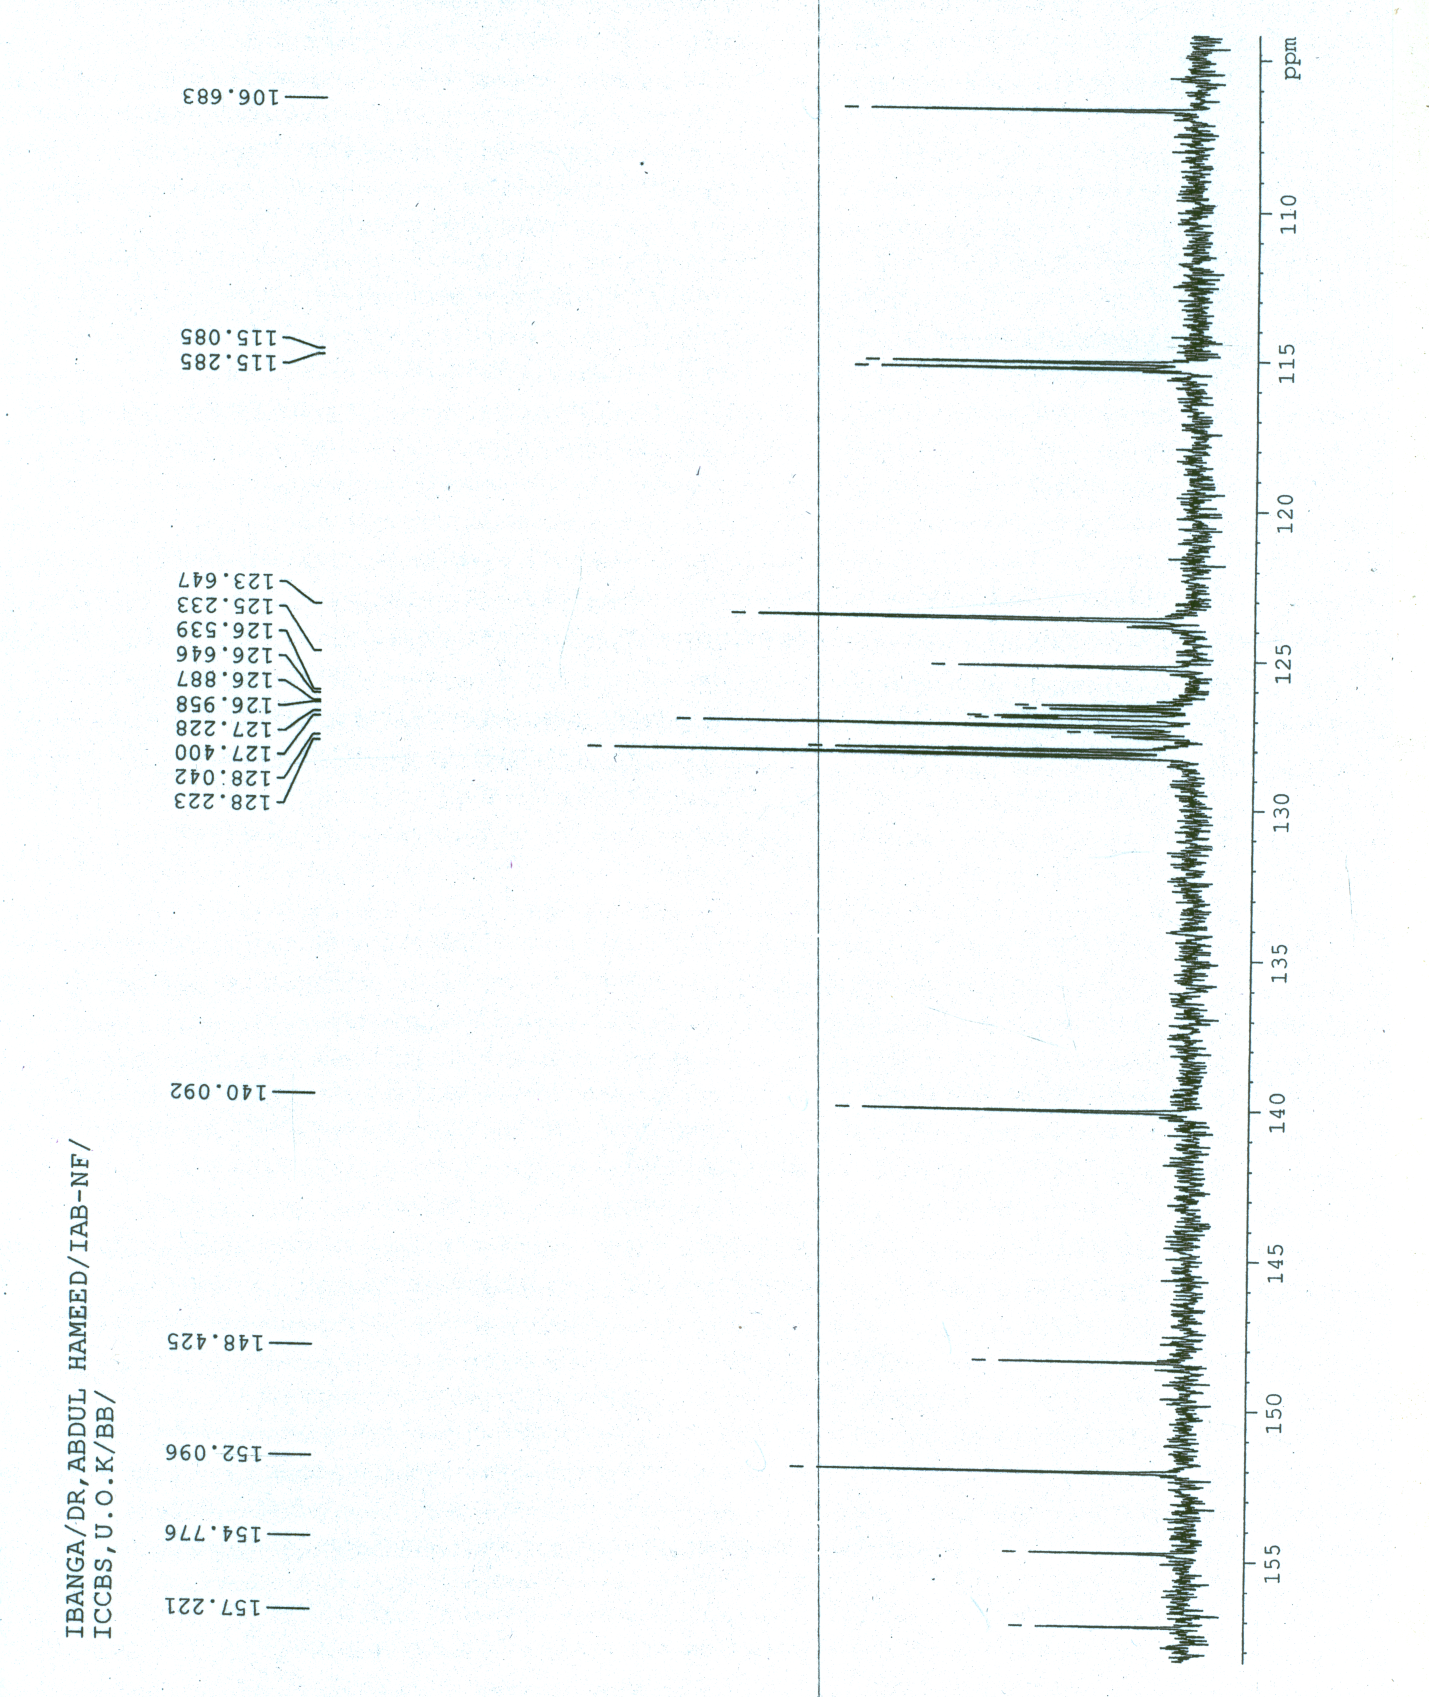

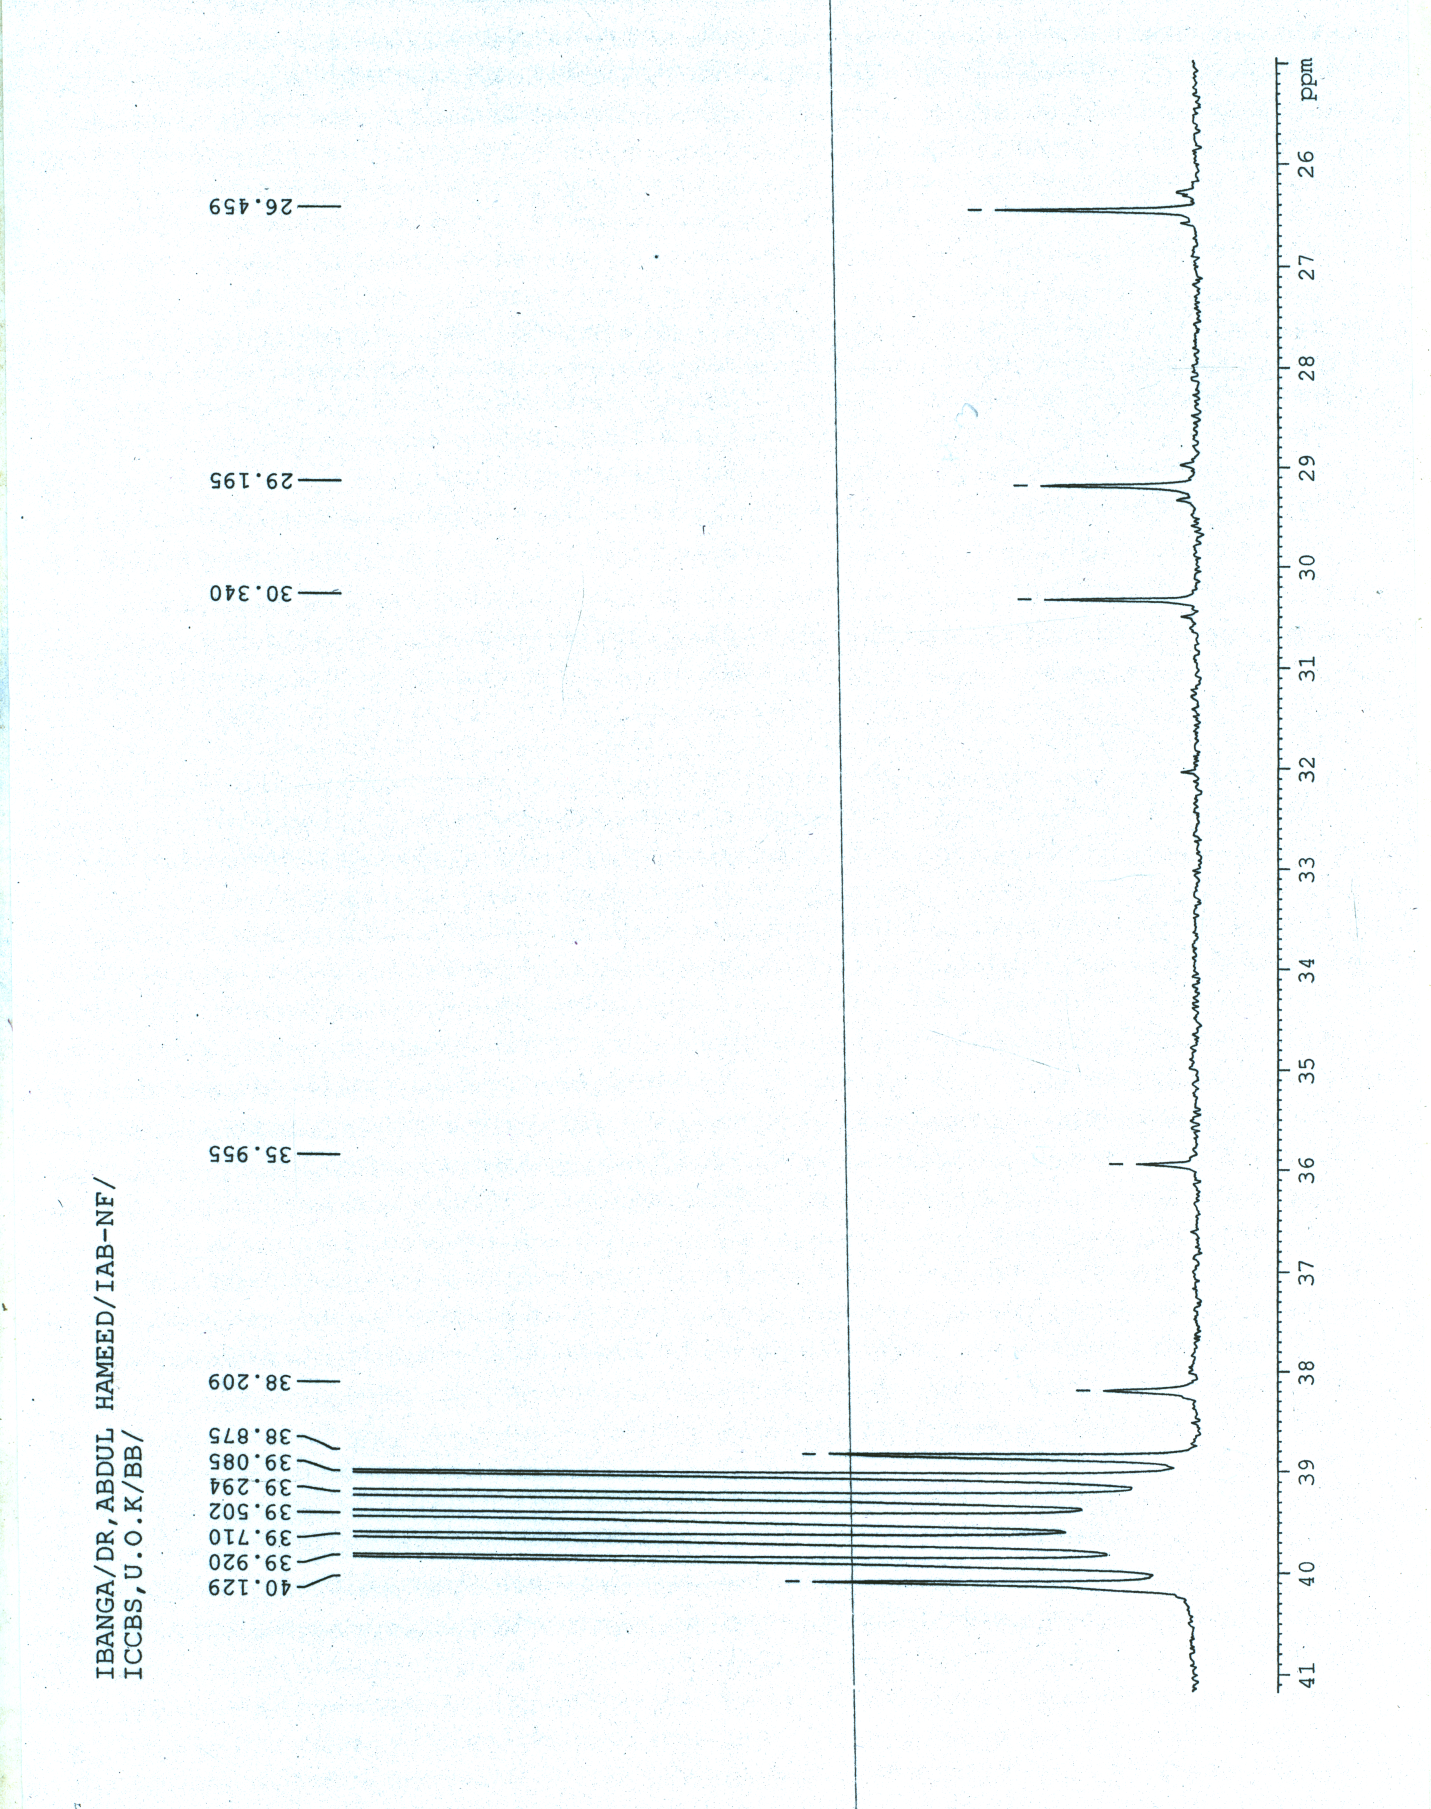
**
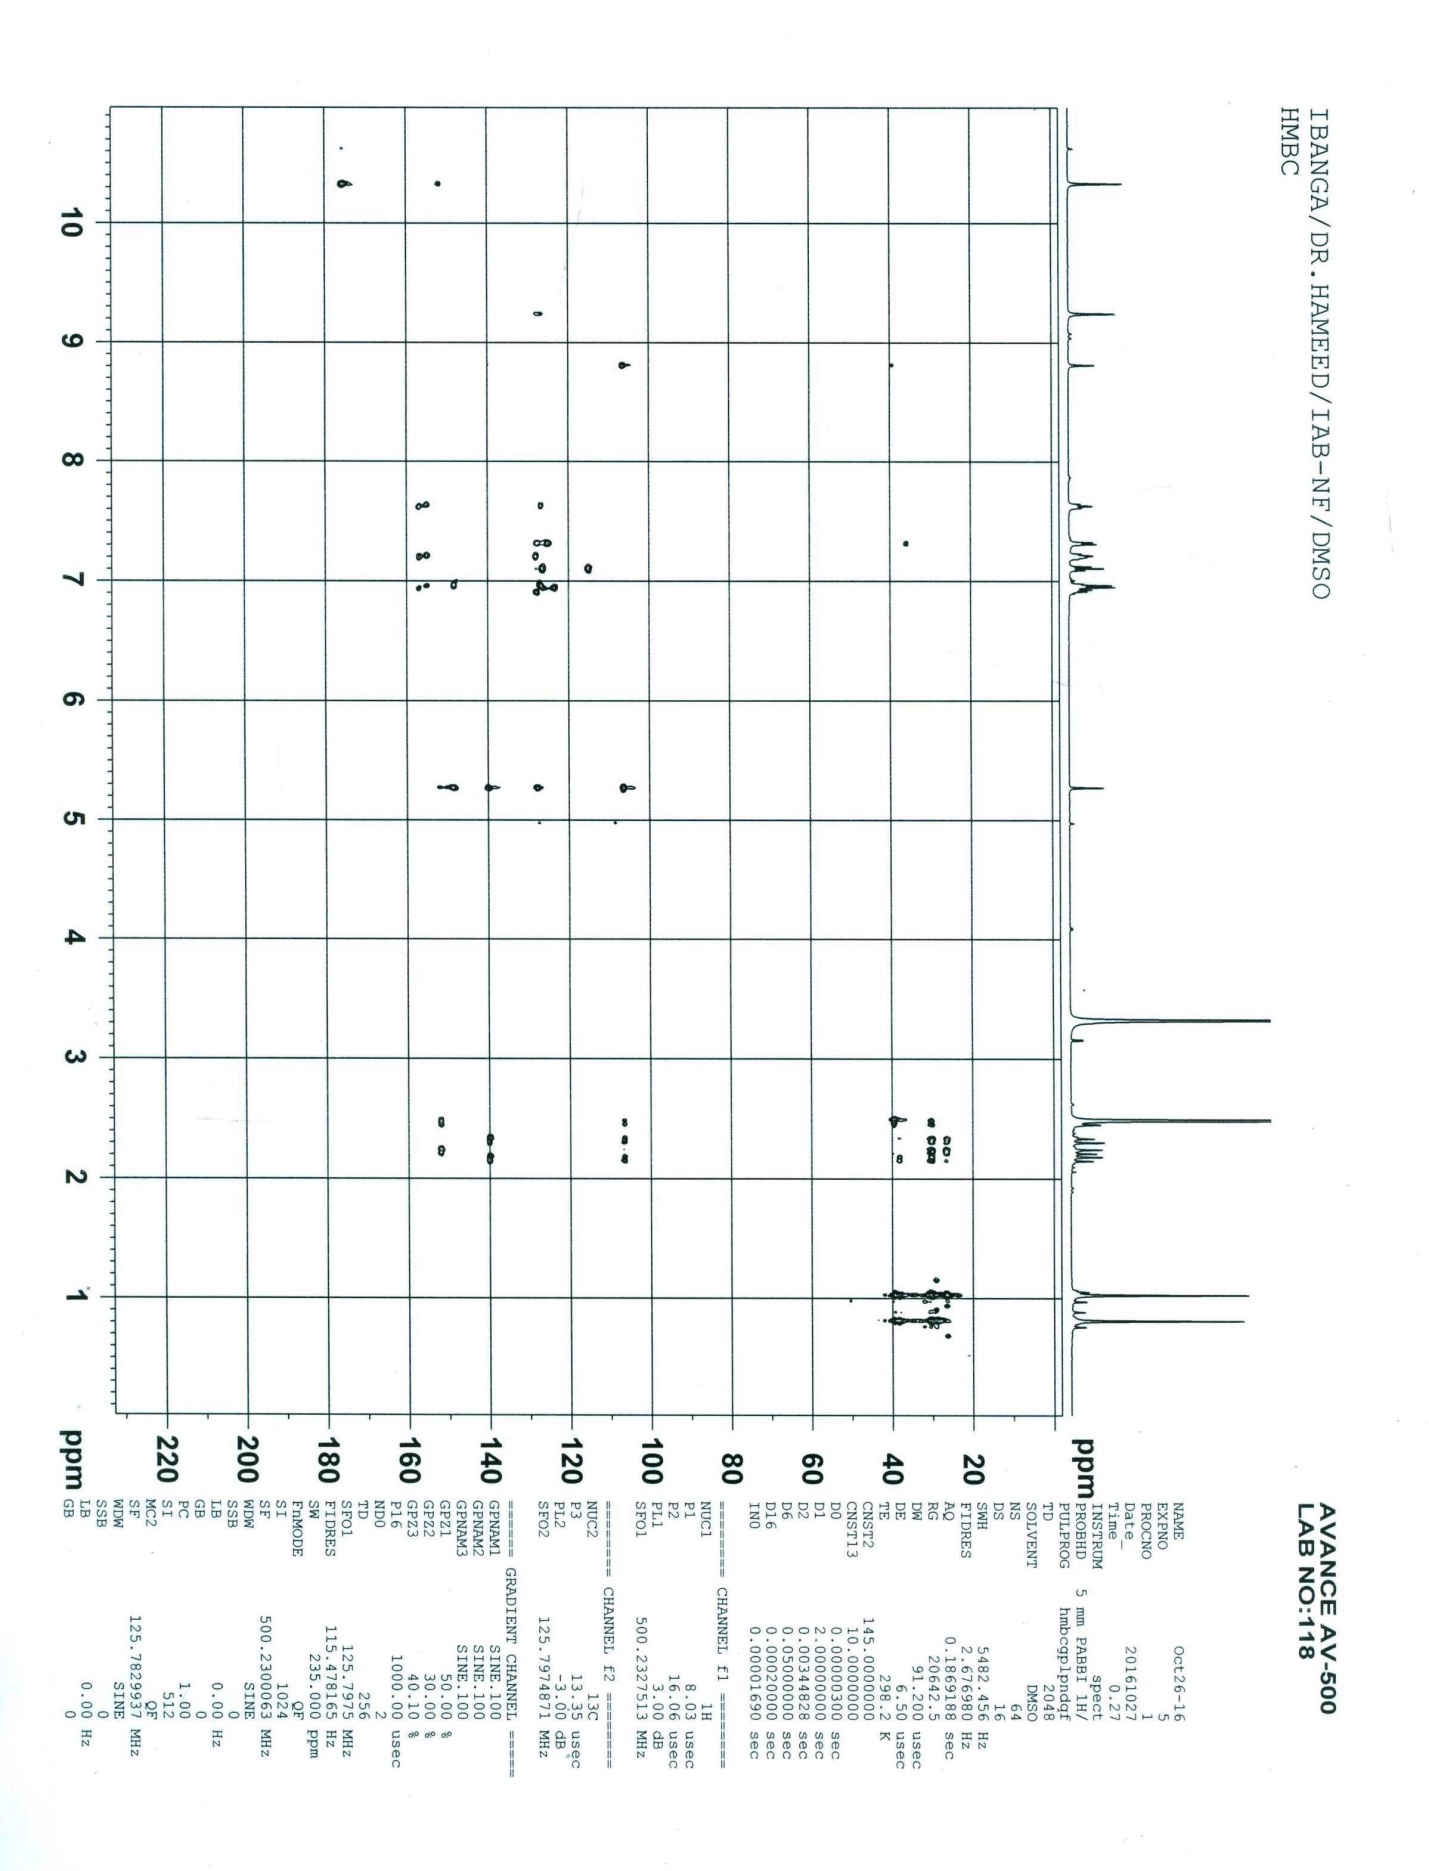

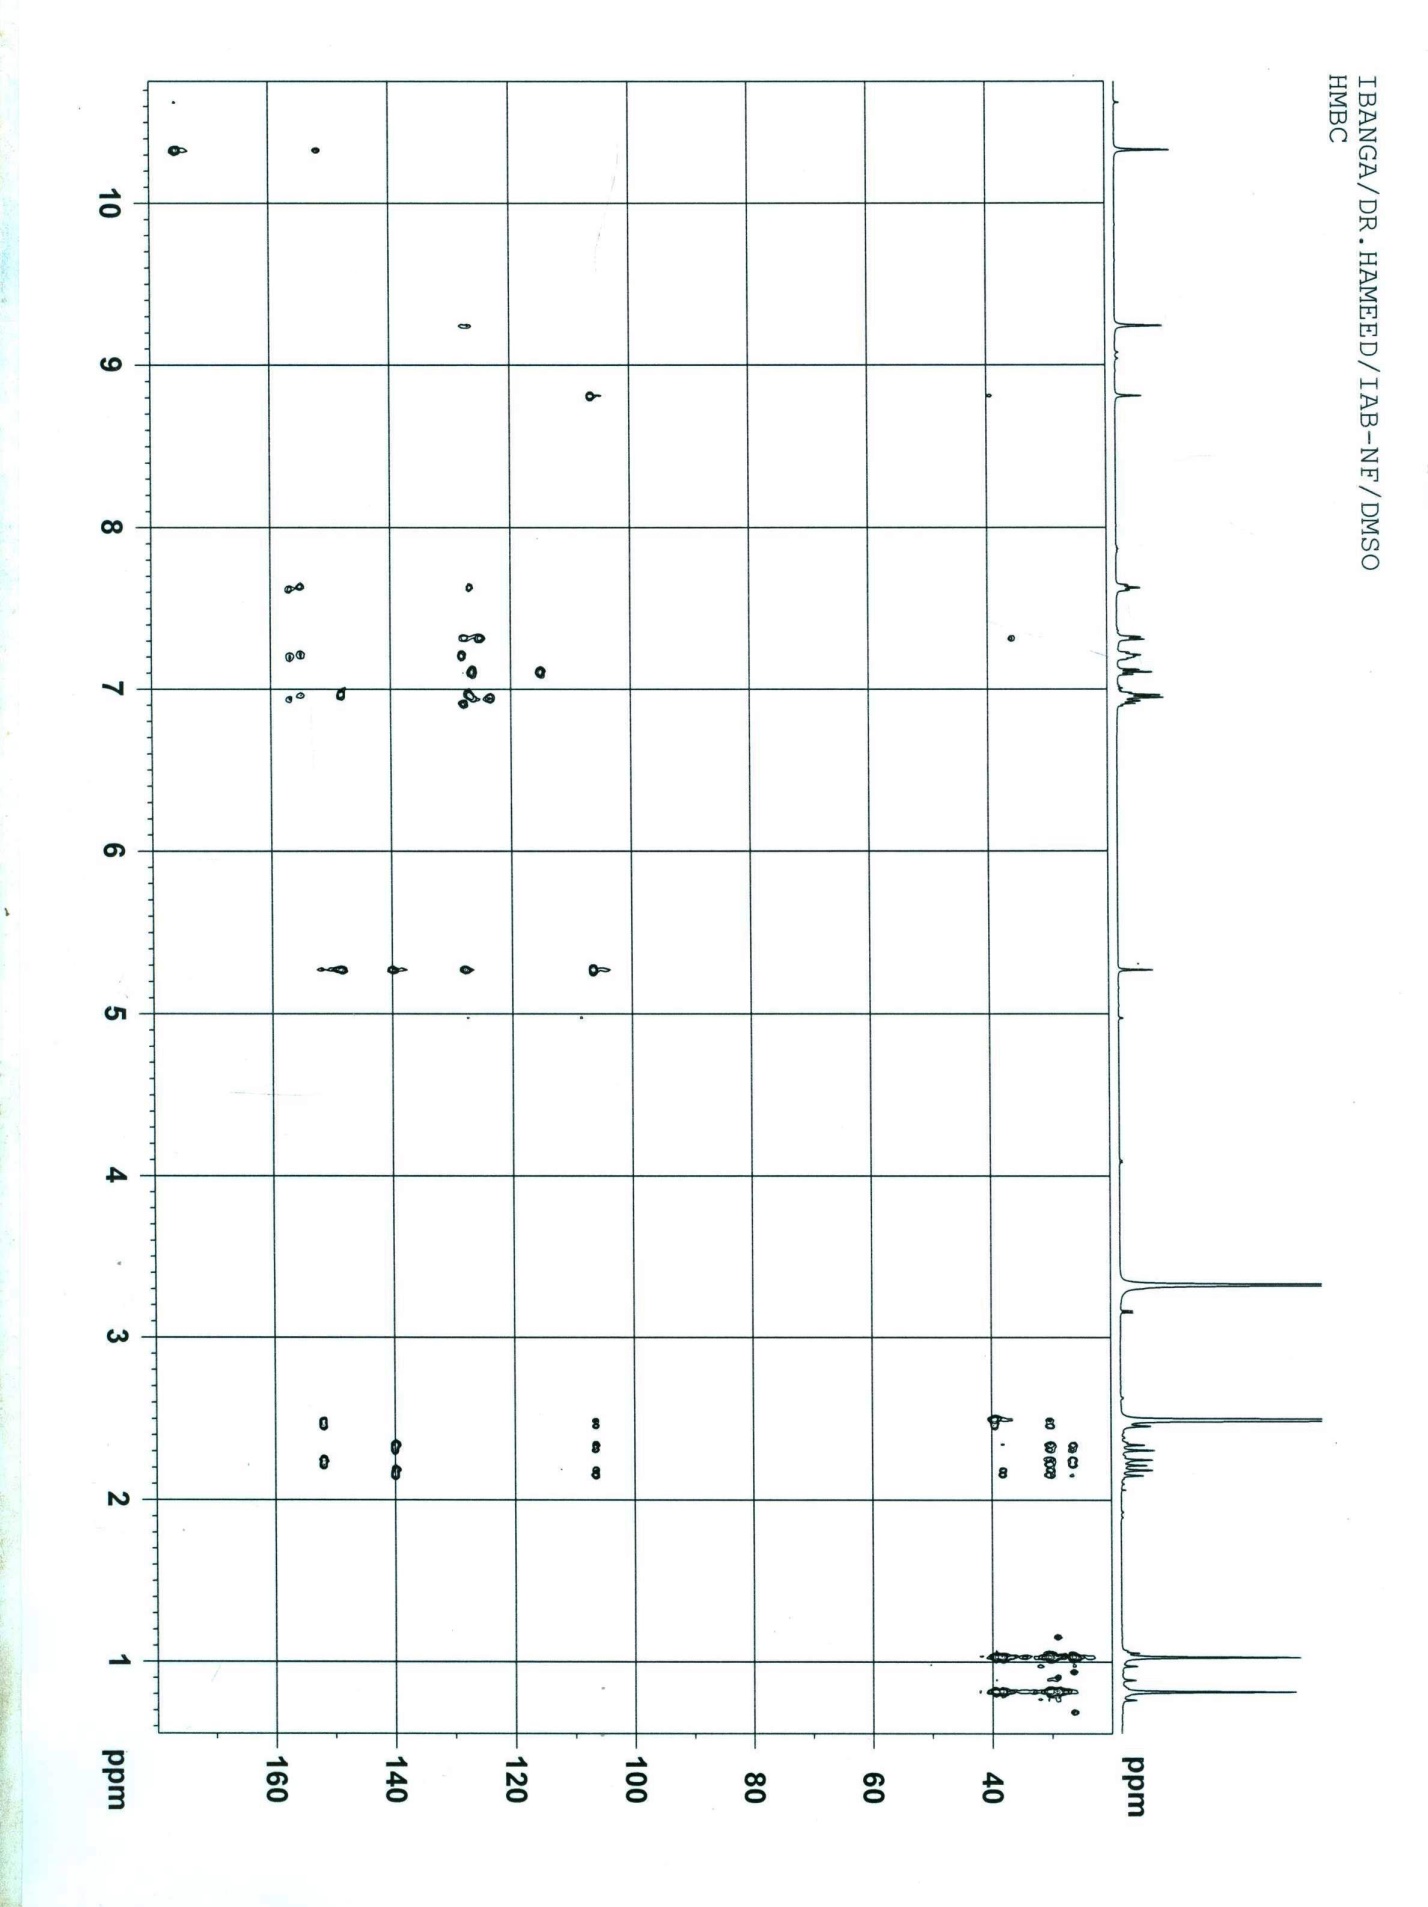

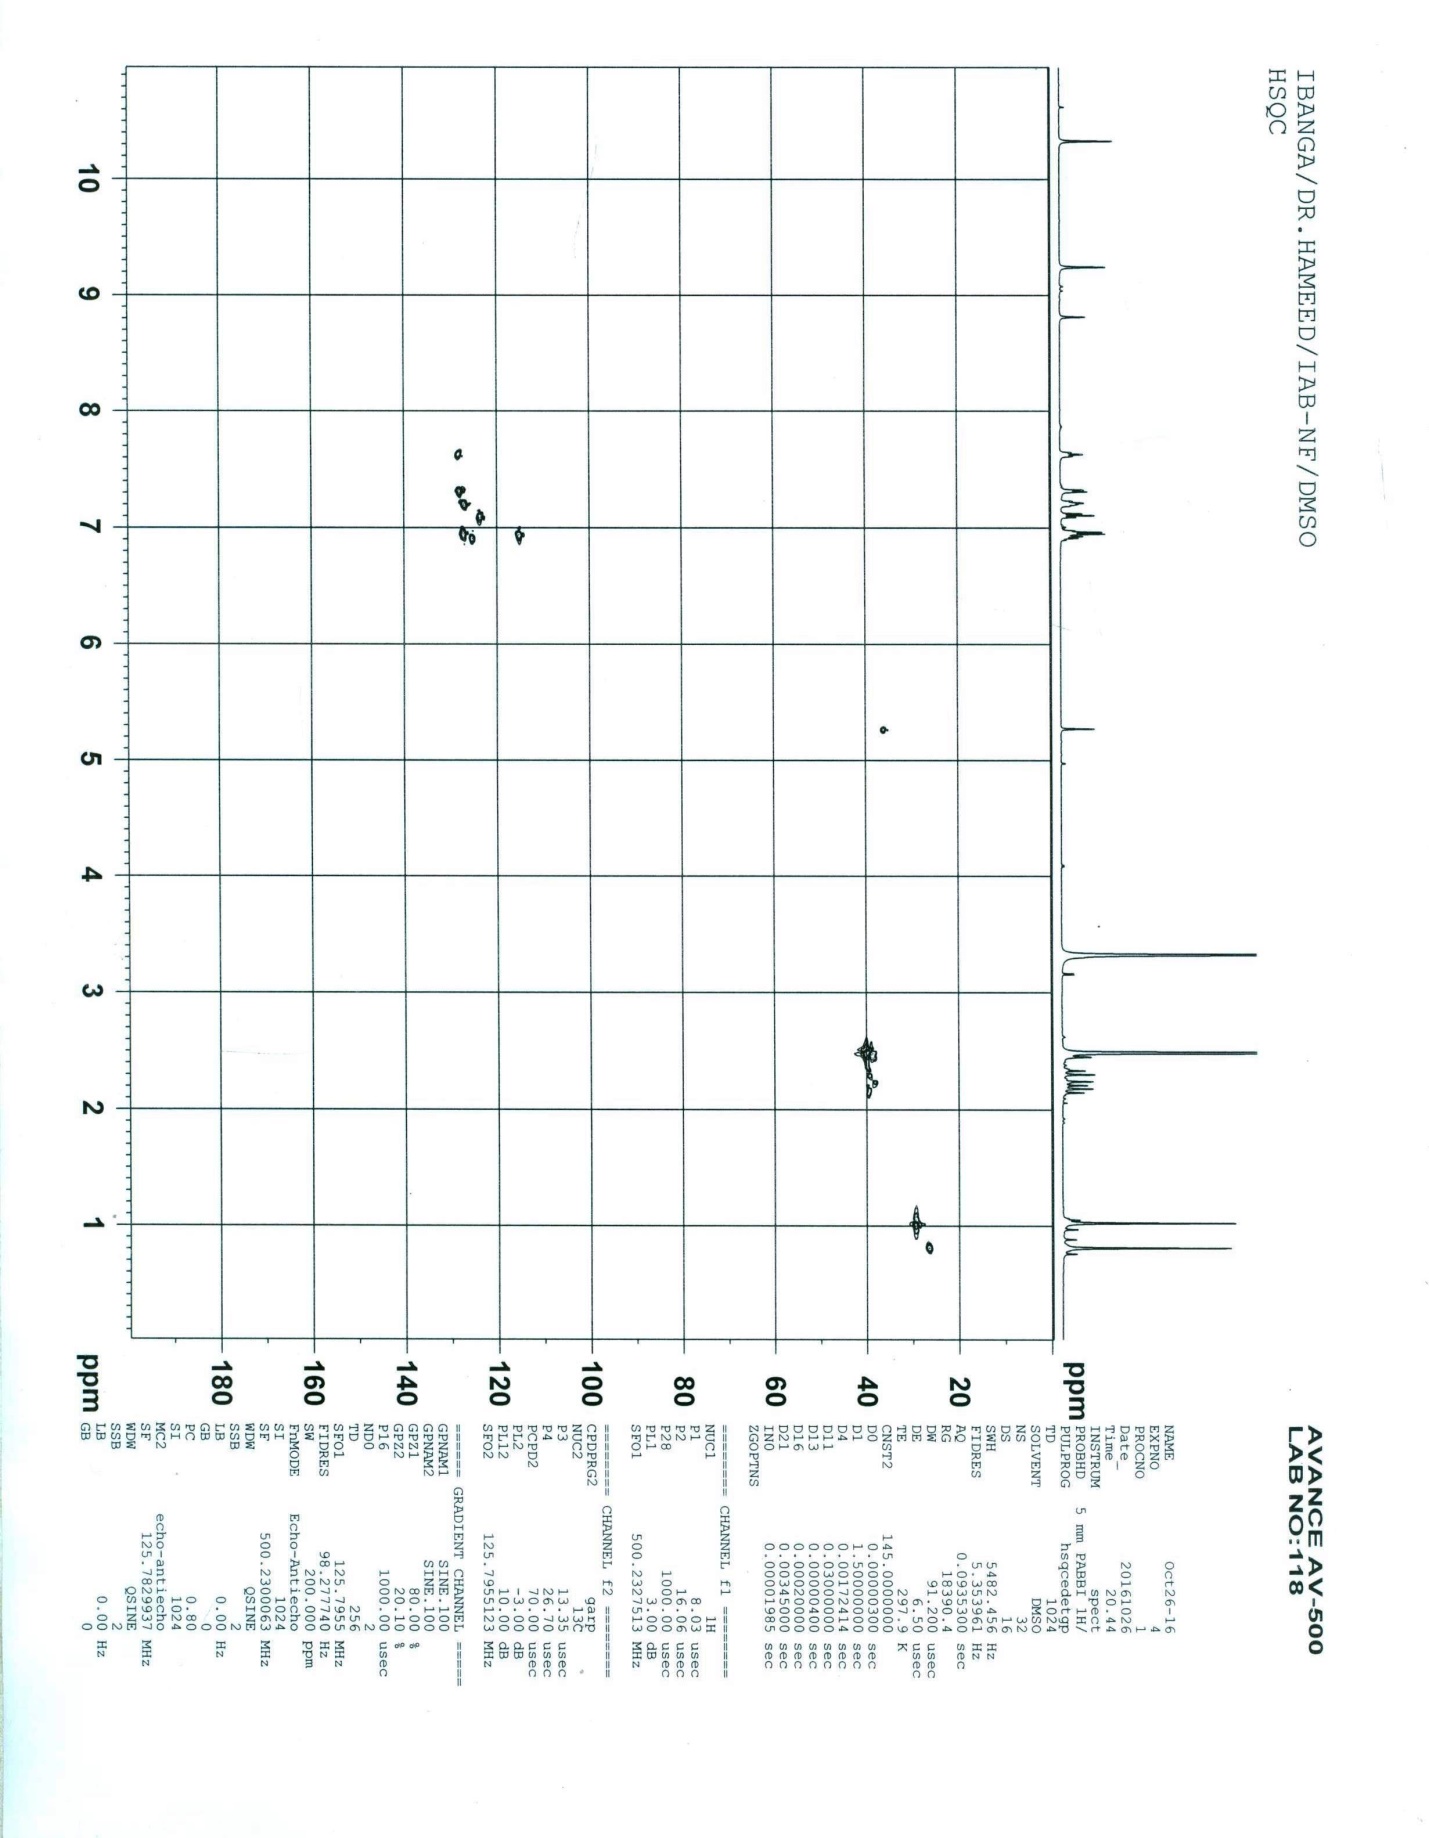

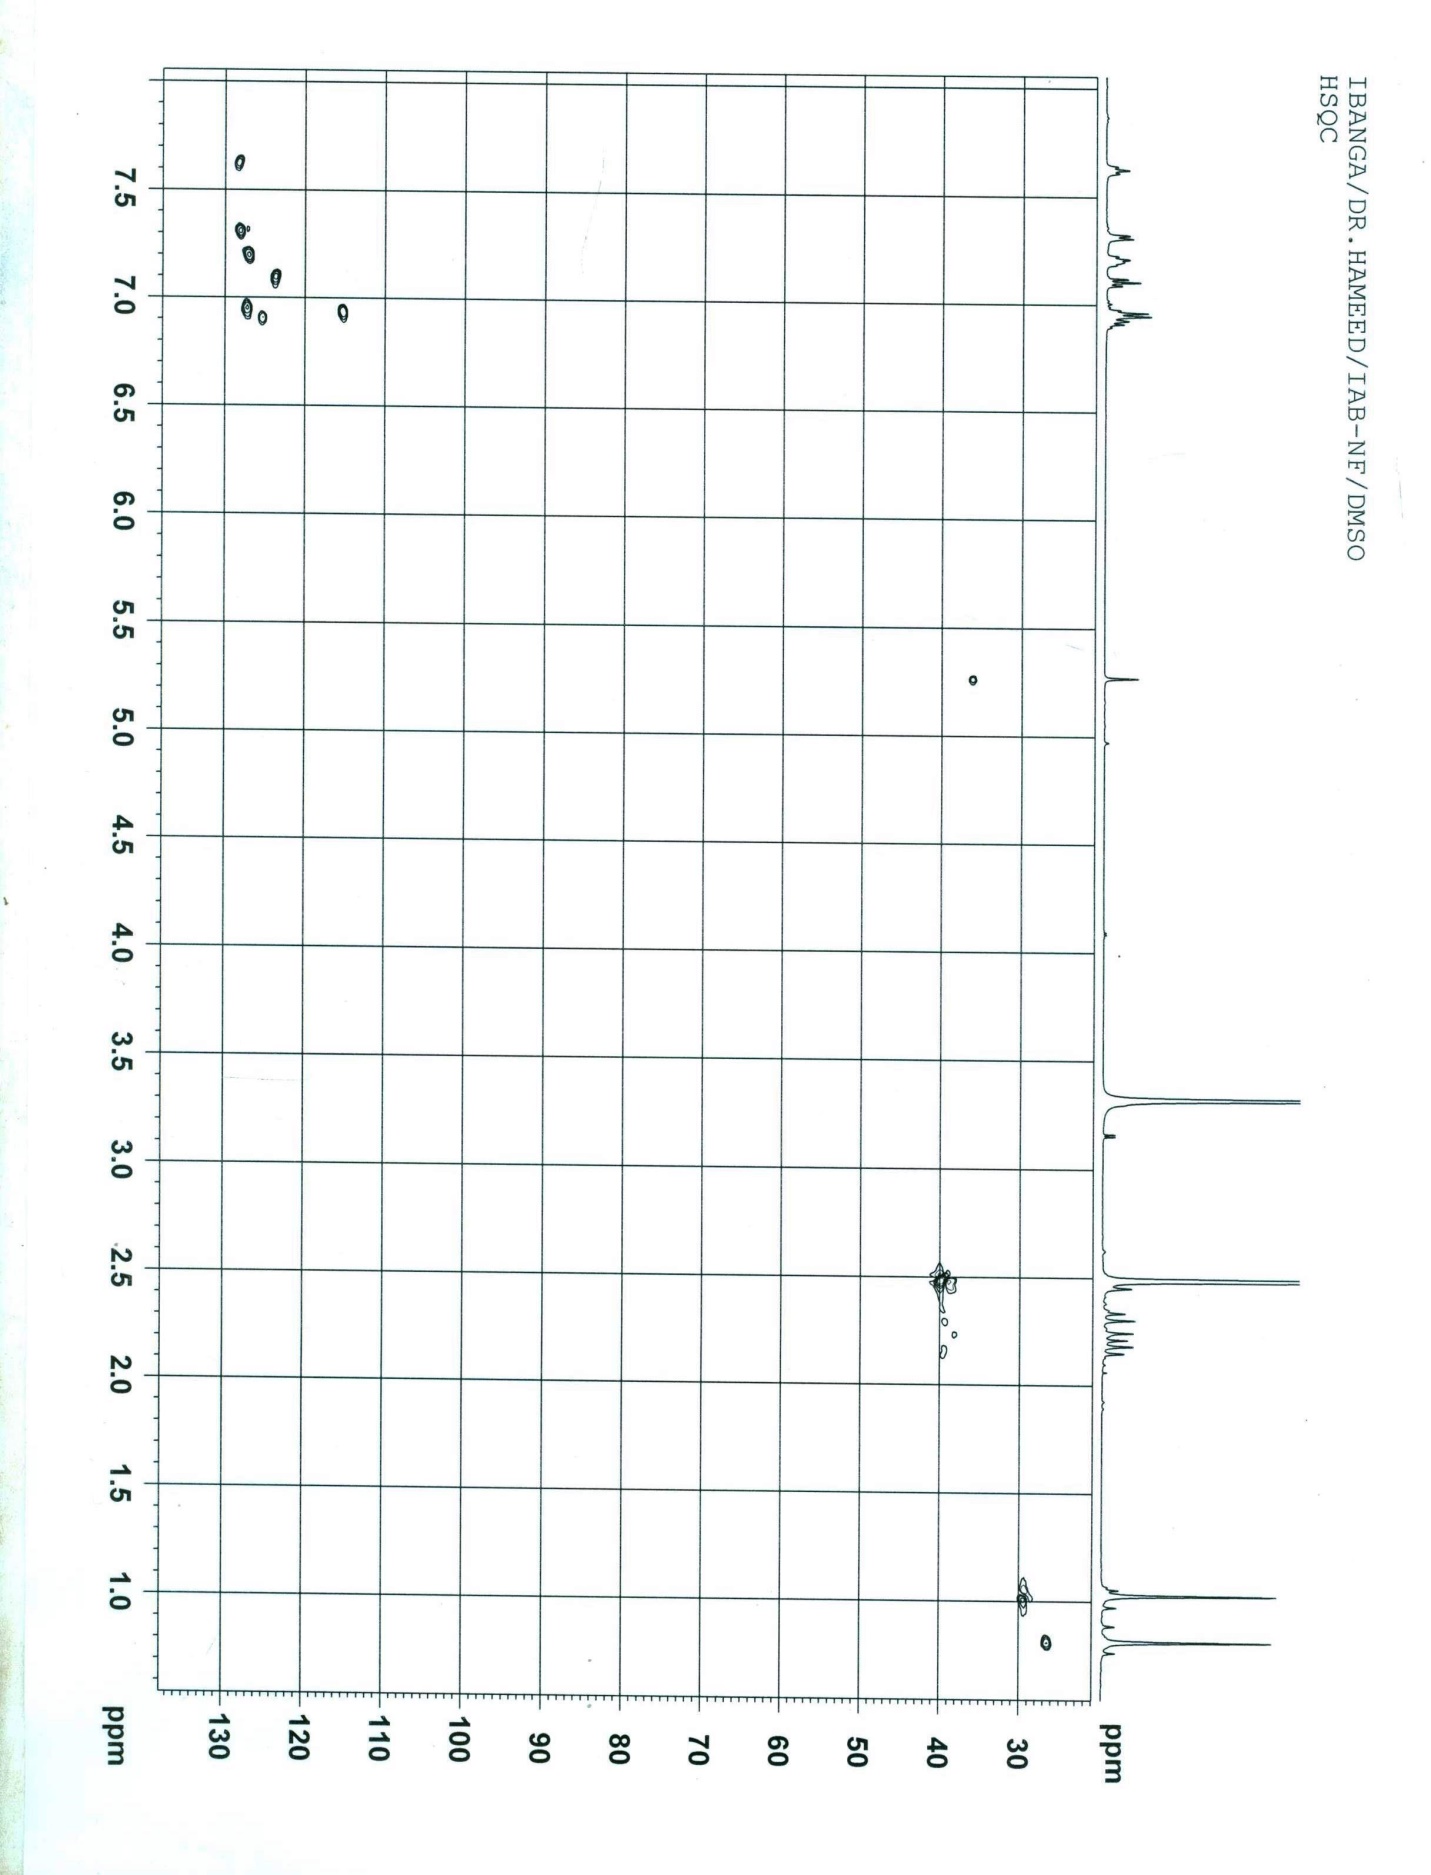
**
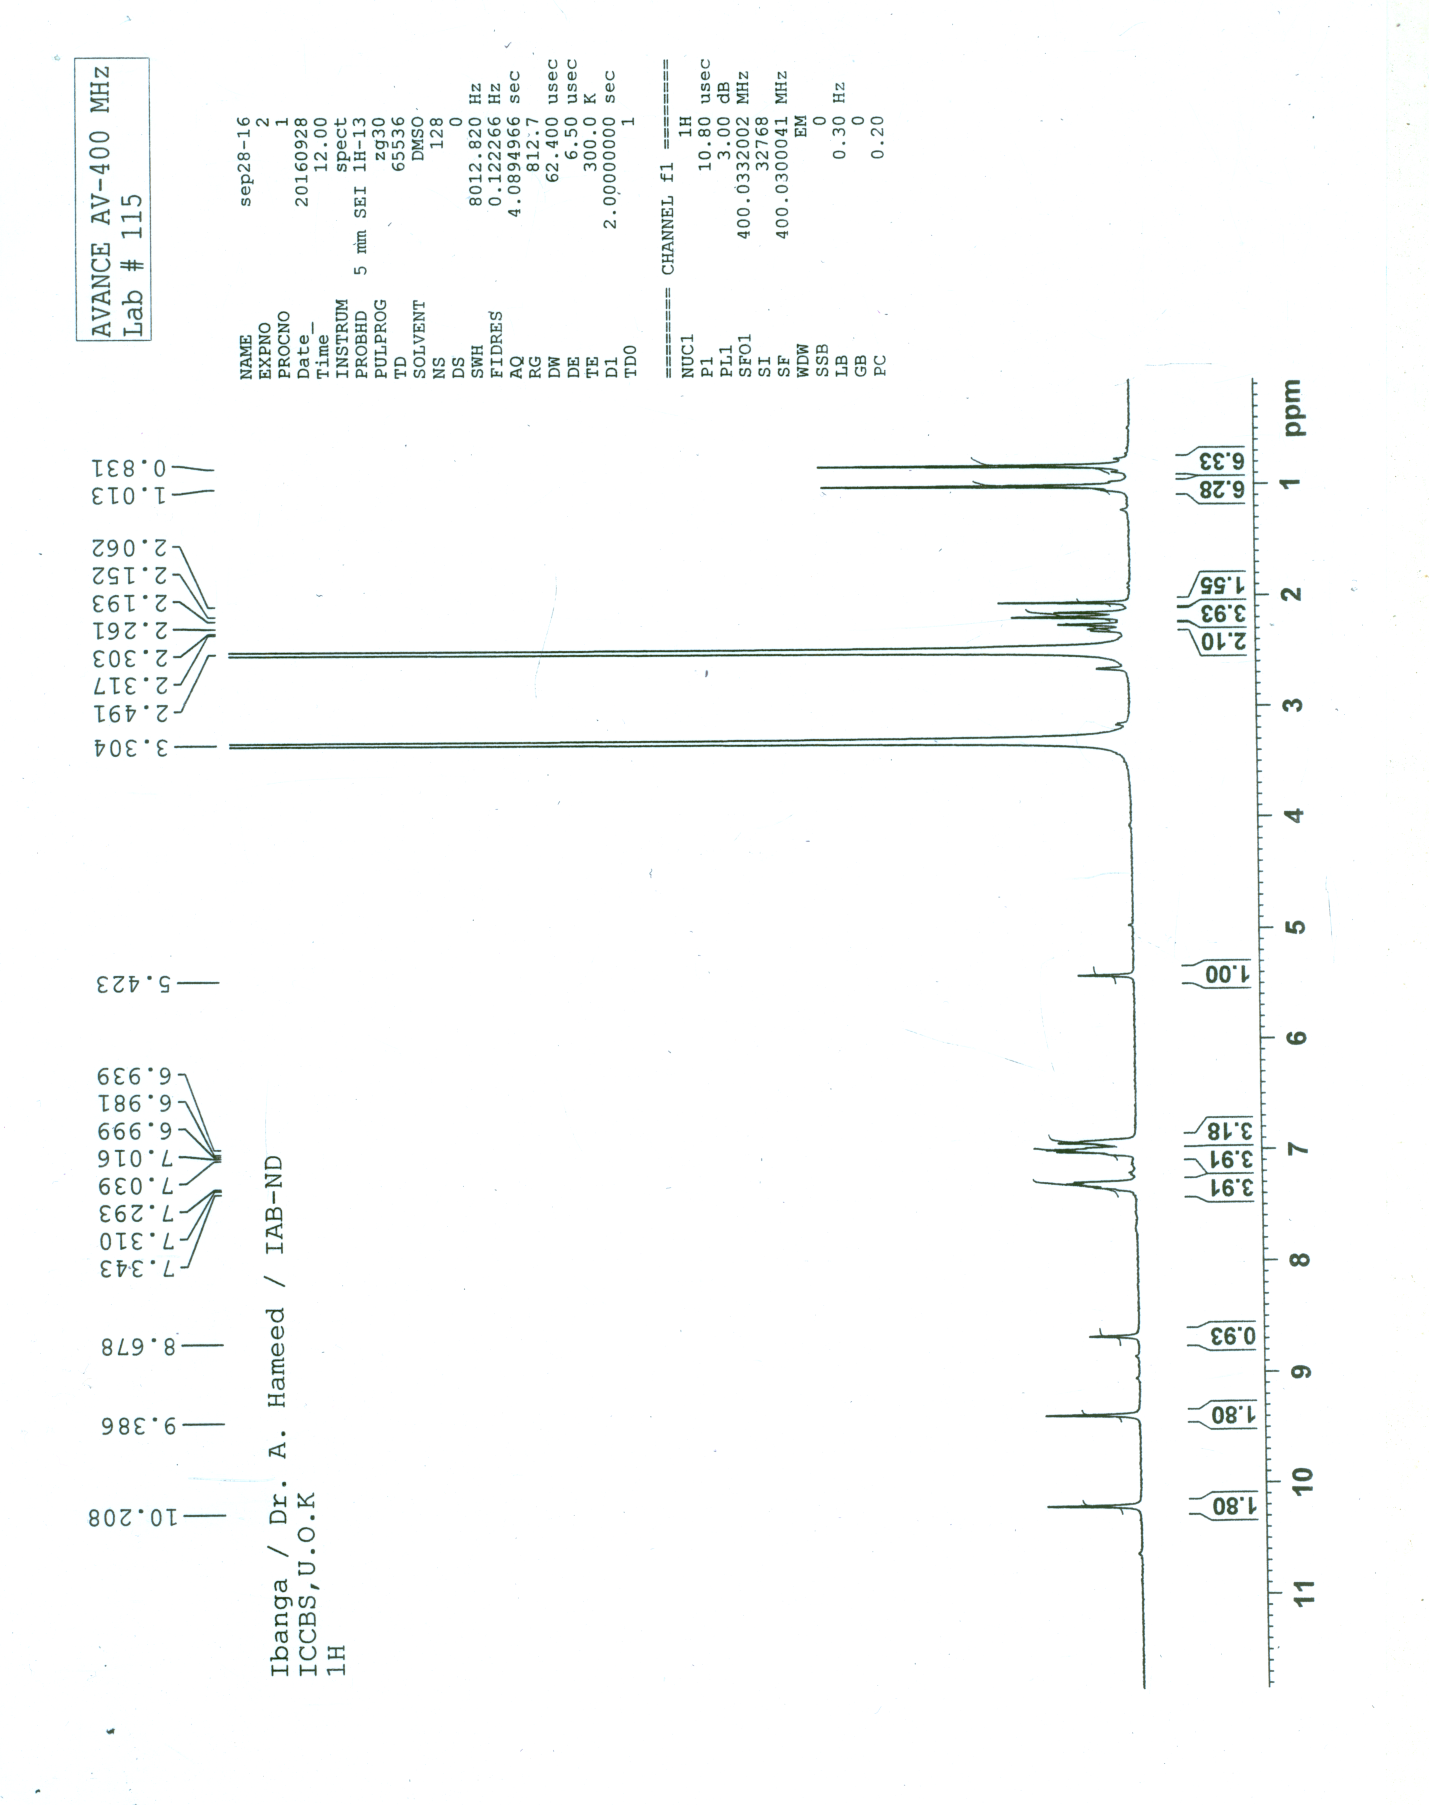

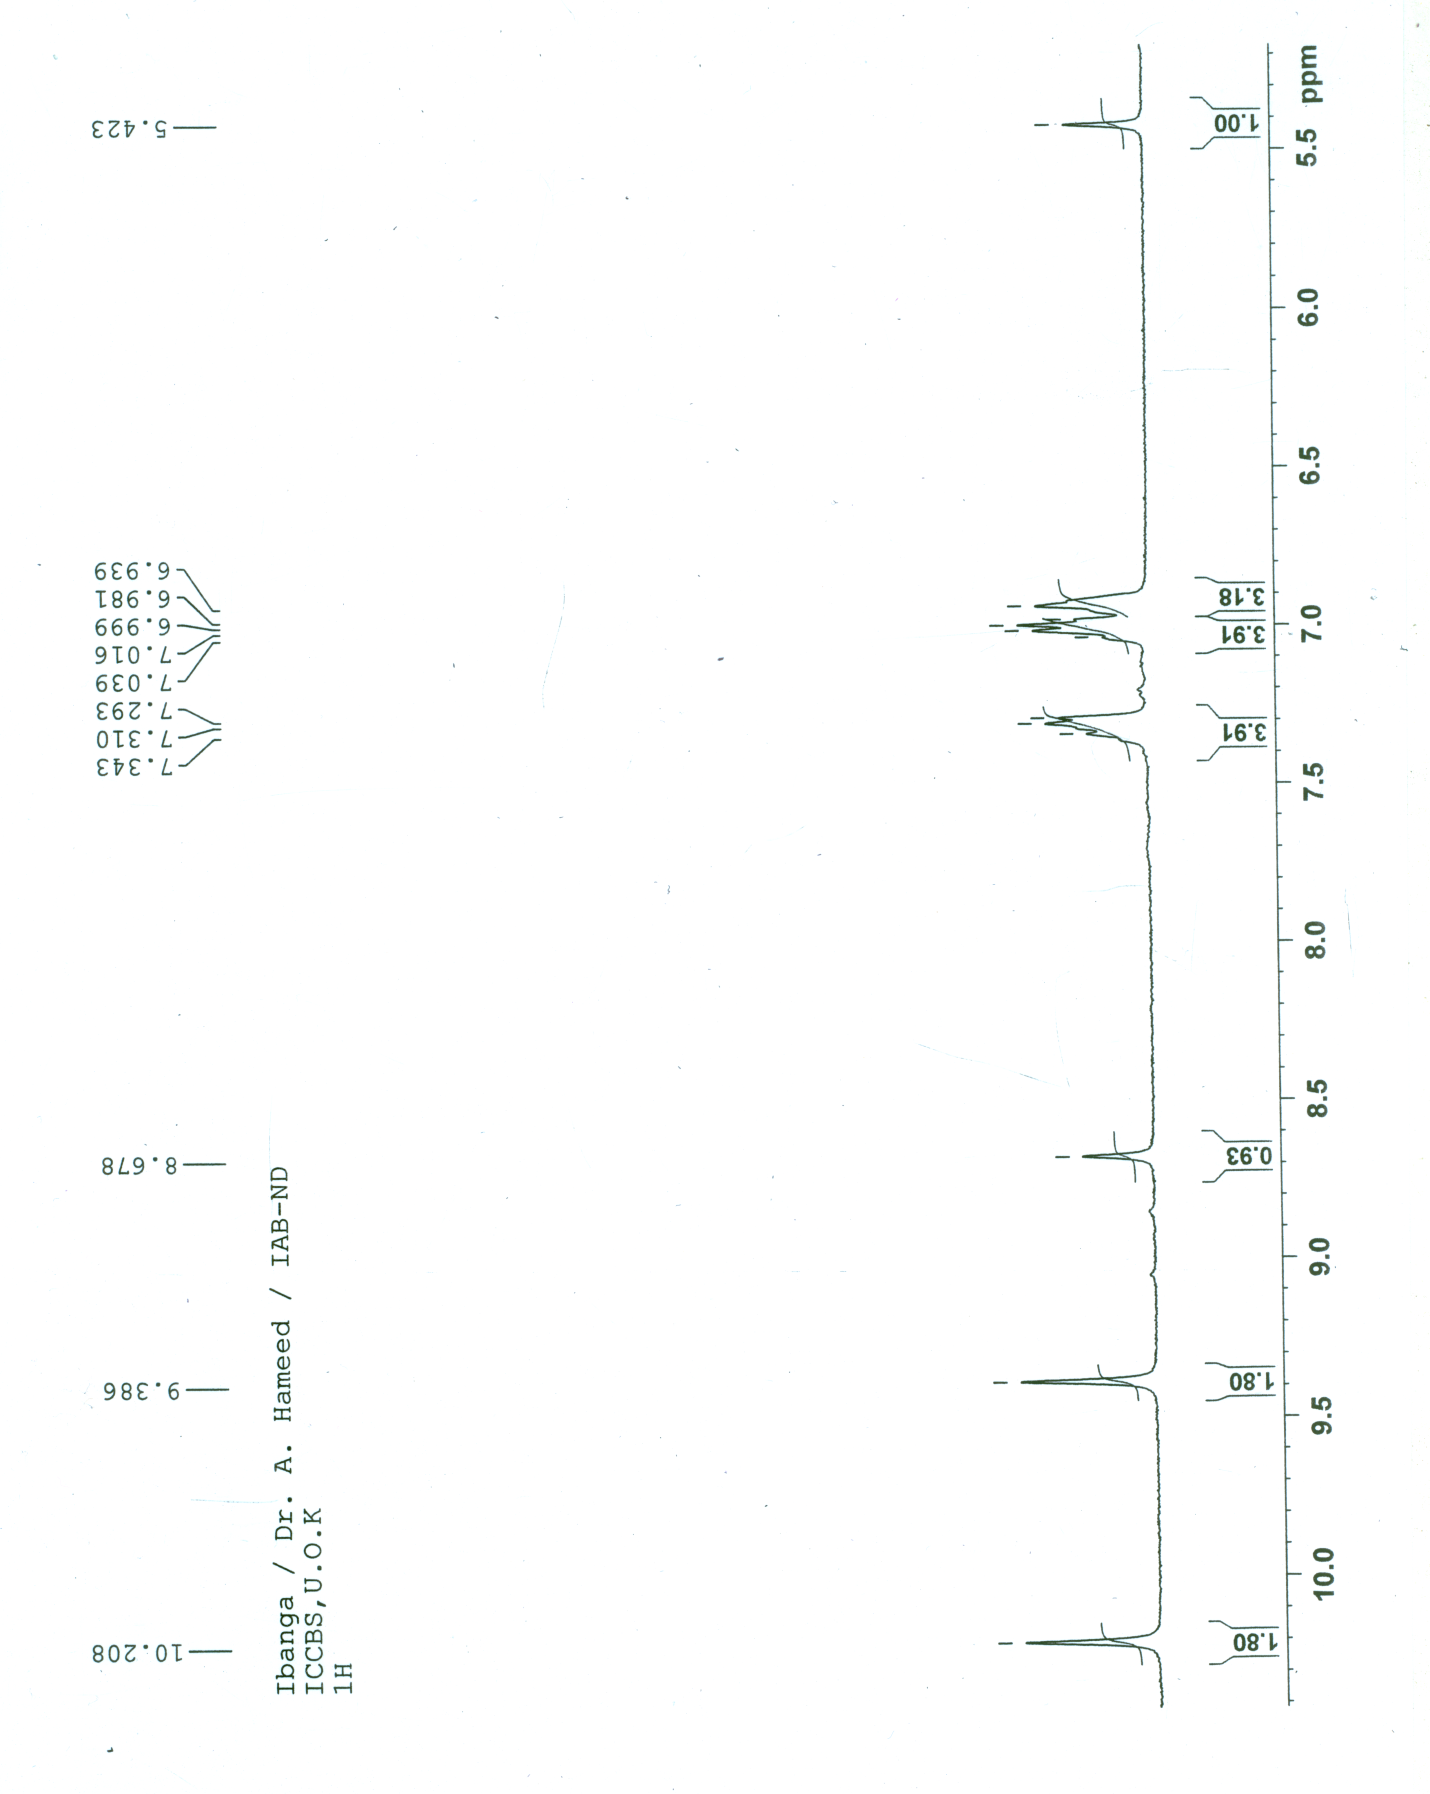

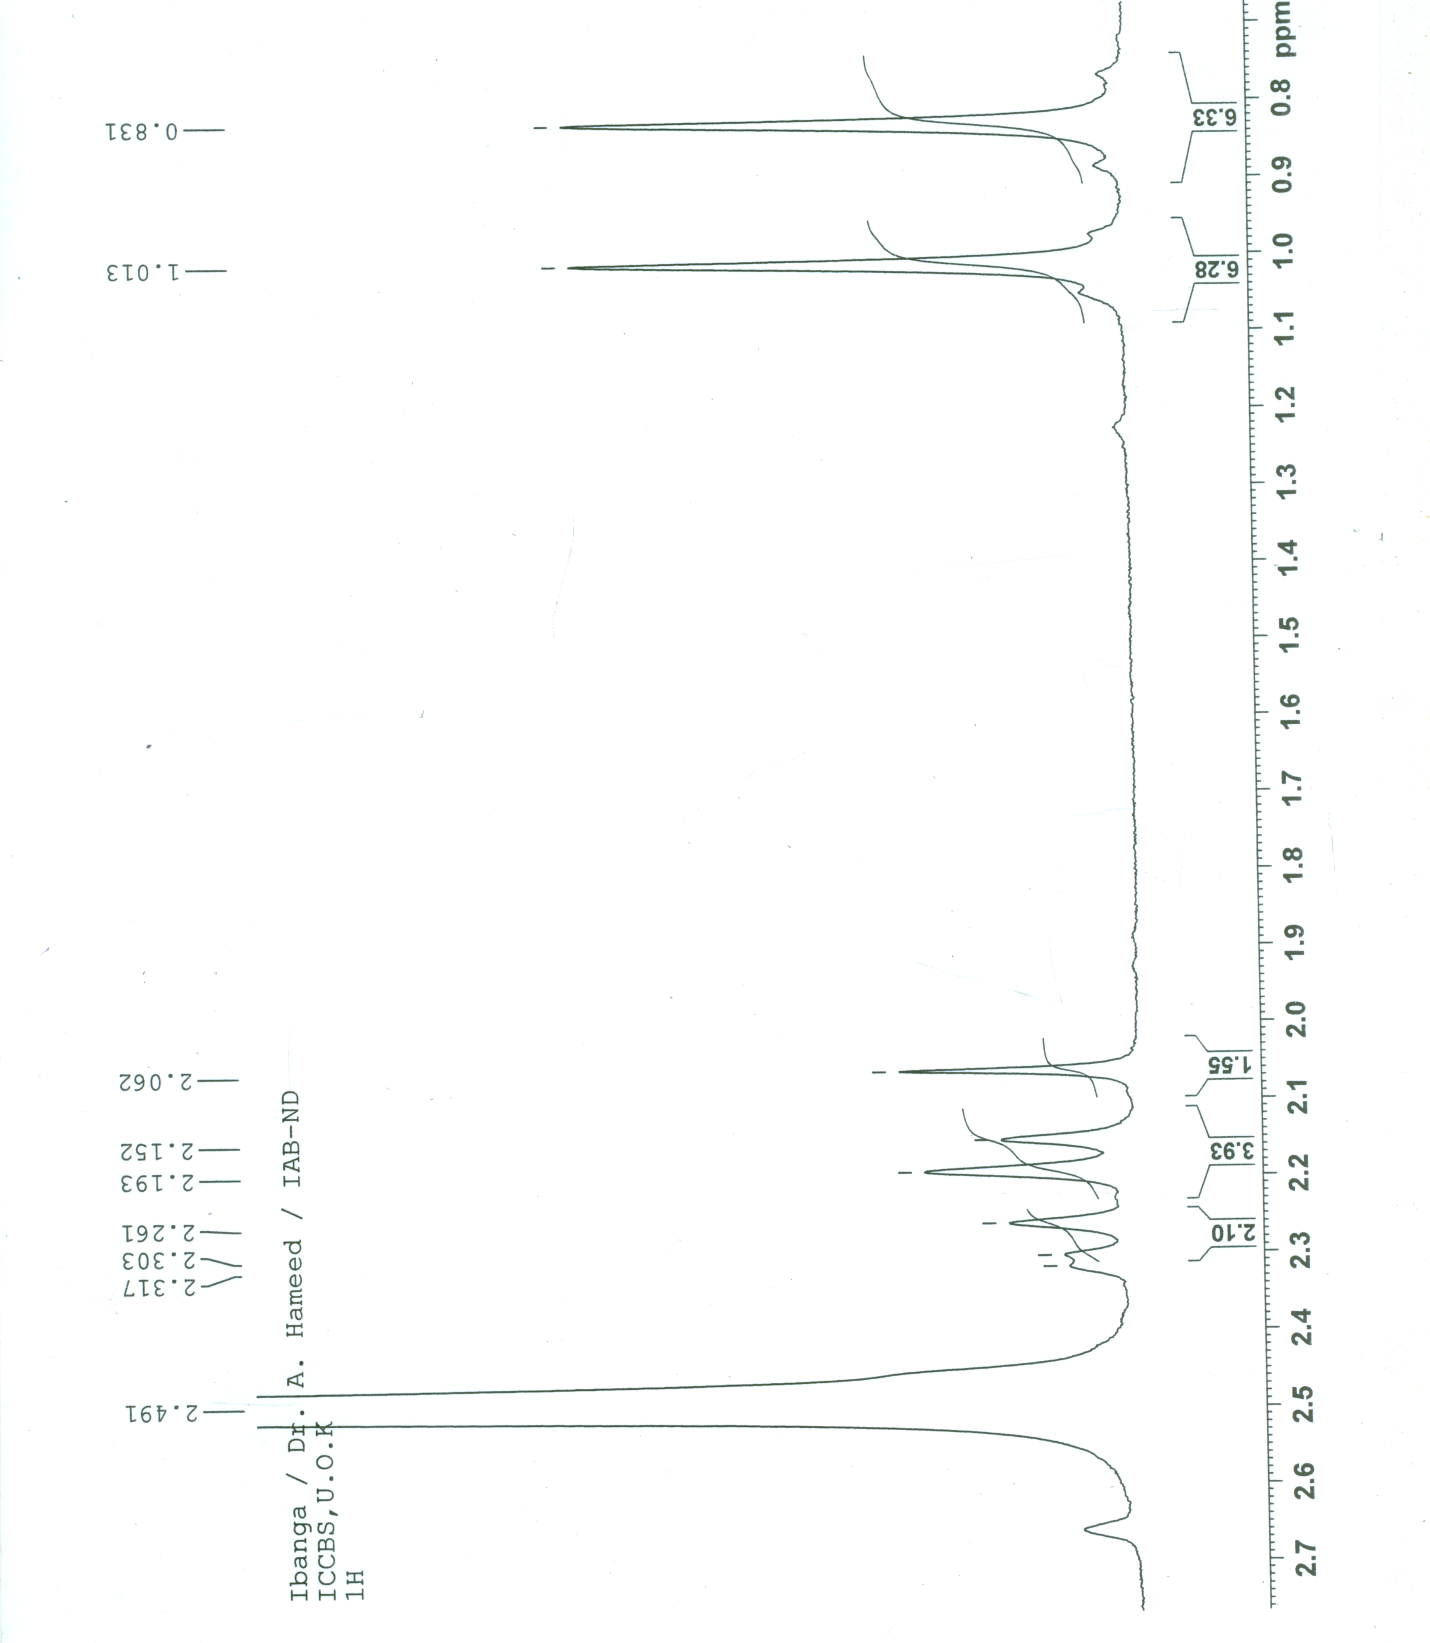
**

1. K. Ayub [khurshidayub@gmail.com](mailto:khurshidayub@gmail.com);

   A. Hameed [abdul_hameed8@hotmail.com](mailto:abdul_hameed8@hotmail.com) / [abdul.hameed@iccs.edu](mailto:abdul.hameed@iccs.edu)

   Tel.: 0092-21-99261701-2; [↑](#footnote-ref-1)
